# Supplementary material
Source: PubMed Central journal article supplement (PMC3514462)
Supplement: NIHMS419840-supplement-1_si_001.pdf [file NIHMS419840-supplement-1_si_001.pdf]

Supporting Information for  
**Synthetic Models for the [FeFe]-Hydrogenase: Catalytic  
 Proton Reduction and the Structure of the Doubly Protonated  
 Intermediate**

Maria E. Carroll, Bryan E. Barton, Thomas B. Rauchfuss\*, Patrick J. Carroll

**Contents**

**p4. Spectroscopic Data**

- p4. Figure S1.  $^1\text{H}$  NMR spectrum of  $\text{Fe}_2(\text{adt}^{\text{NH}})(\text{CO})_2(\text{dppv})_2$  ( $\mathbf{1}^{\text{NH}}$ )
- p5. Figure S2. Variable temperature  $^{31}\text{P}$  NMR spectrum of  $\text{Fe}_2(\text{adt}^{\text{NH}})(\text{CO})_2(\text{dppv})_2$  ( $\mathbf{1}^{\text{NH}}$ )
- p6. Figure S3. High field  $^1\text{H}$  NMR spectrum of  $[\text{t-HFe}_2(\text{adt}^{\text{NH}})(\text{CO})_2(\text{dppv})_2]\text{BAr}^{\text{F}}_{24}$   
 $([\text{t-H}\mathbf{1}^{\text{NH}}]\text{BAr}^{\text{F}}_{24})$
- p6. Figure S4.  $^{31}\text{P}$  NMR spectrum of  $[\text{t-HFe}_2(\text{adt}^{\text{NH}})(\text{CO})_2(\text{dppv})_2]\text{BAr}^{\text{F}}_{24}$  ( $[\text{t-H}\mathbf{1}^{\text{NH}}]\text{BAr}^{\text{F}}_{24}$ )
- p7. Figure S5. High field region of  $^{31}\text{P}$  Decoupled  $^1\text{H}$  NMR of  $[\text{t-H}\mathbf{1}^{\text{NH}}]\text{BAr}^{\text{F}}_{24}$
- p8. Figure S6. High field region of  $^1\text{H}$  NMR spectrum of  $[\text{t-H}\mathbf{1}^{\text{NH}}]\text{BAr}^{\text{F}}_{24}$  at 0 °C,  
 $\text{sym-}[\mu\text{-H}\mathbf{1}^{\text{NH}}]^+$  at 15 °C, and  $\text{sym-}[\mu\text{-H}\mathbf{1}^{\text{NH}}]^+$  recooled to 0 °C
- p9. Figure S7.  $^{31}\text{P}$  NMR spectrum of  $[\text{t-H}\mathbf{1}^{\text{NH}}]\text{BAr}^{\text{F}}_{24}$  at 0 °C,  $\text{sym-}[\mu\text{-H}\mathbf{1}^{\text{NH}}]^+$  at 15 °C,  
 and  $\text{sym-}[\mu\text{-H}\mathbf{1}^{\text{NH}}]^+$  recooled to 0 °C
- p10. Figure S8. Variable temperature high field  $^1\text{H}$  NMR spectrum of  
 $[\text{t-HFe}_2(\text{adt}^{\text{NH}_2})(\text{CO})_2(\text{dppv})_2](\text{BAr}^{\text{F}}_{24})_2$  ( $[\text{t-H}\mathbf{1}^{\text{NH}_2}](\text{BAr}^{\text{F}}_{24})_2$ )
- p11. Figure S9. Variable temperature  $^{31}\text{P}$  NMR spectrum of  
 $[\text{t-HFe}_2(\text{adt}^{\text{NH}_2})(\text{CO})_2(\text{dppv})_2](\text{BAr}^{\text{F}}_{24})_2$  ( $[\text{t-H}\mathbf{1}^{\text{NH}_2}](\text{BAr}^{\text{F}}_{24})_2$ )
- p12. Figure S10. IR spectrum of  $[\text{t-HFe}_2(\text{adt}^{\text{NH}_2})(\text{CO})_2(\text{dppv})_2]^{2+}$  ( $[\text{t-H}\mathbf{1}^{\text{NH}_2}]^{2+}$ ) formed by  
 protonation of  $\mathbf{1}$  with  $\text{HBF}_4\cdot\text{Et}_2\text{O}$
- p13. Figure S11. IR spectrum of  $[\text{t-HFe}_2(\text{adt}^{\text{NH}_2})(\text{CO})_2(\text{dppv})_2]^{2+}$  ( $[\text{t-H}\mathbf{1}^{\text{NH}_2}]^{2+}$ ) formed by  
 protonation of  $\mathbf{1}$  with  $\text{CF}_3\text{COOH}$
- p14. Figure S12. High field  $^1\text{H}$  NMR spectra of a mixture of  $[\text{t-H}\mathbf{1}^{\text{NH}}]^+$  and  $[\text{t-H}\mathbf{1}^{\text{NH}_2}]^{2+}$
- p15. Figure S13. Titration of  $[\text{Bu}_4\text{N}][\text{BF}_4]$  to  $[\text{t-H}\mathbf{1}^{\text{NH}}]\text{BAr}^{\text{F}}_{24}$
- p16. Figure S14. High field  $^1\text{H}$  NMR spectra of  $[\text{Fe}_2(\text{adt}^{\text{NH}})(\mu\text{-H})(\text{CO})_2(\text{dppv})_2]^+$  ( $[\mu\text{-}\mathbf{1}^{\text{NH}}]^+$ )  
 and  $[\text{Fe}_2(\text{adt}^{\text{NH}_2})(\mu\text{-H})(\text{CO})_2(\text{dppv})_2]^{2+}$  ( $[\mu\text{-H}\mathbf{1}^{\text{NH}_2}]^{2+}$ )

p16. Figure S15.  $^{31}\text{P}$  NMR spectra of  $[\text{Fe}_2(\text{adt}^{\text{NH}})(\mu\text{-H})(\text{CO})_2(\text{dppv})_2]^+$  ( $[\mu\text{-H1}^{\text{NH}}]^+$ ) and  $[\text{Fe}_2(\text{adt}^{\text{NH}_2})(\mu\text{-H})(\text{CO})_2(\text{dppv})_2]^{2+}$  ( $[\mu\text{-H1}^{\text{NH}_2}]^{2+}$ )

p17. Figure S16. IR spectra of  $[\text{Fe}_2(\text{adt}^{\text{NH}})(\mu\text{-H})(\text{CO})_2(\text{dppv})_2]^+$  ( $[\mu\text{-H1}^{\text{NH}}]^+$ ) and  $[\text{Fe}_2(\text{adt}^{\text{NH}_2})(\mu\text{-H})(\text{CO})_2(\text{dppv})_2]^{2+}$  ( $[\mu\text{-H1}^{\text{NH}_2}]^{2+}$ )

p18. Figure S17. High field  $^1\text{H}$  NMR spectrum of  $[\text{HFe}_2(\text{pdt})(\text{CO})_2(\text{dppv})_2]\text{BAr}^{\text{F}}_{24}$  ( $[\text{t-H2}]\text{BAr}^{\text{F}}_{24}$ )

p18. Figure S18.  $^{31}\text{P}$  NMR spectrum of  $[\text{HFe}_2(\text{pdt})(\text{CO})_2(\text{dppv})_2]\text{BAr}^{\text{F}}_{24}$  ( $[\text{t-H2}]\text{BAr}^{\text{F}}_{24}$ )

p19. Figure S19. High field region of  $^{31}\text{P}$  Decoupled  $^1\text{H}$  NMR of  $[\text{t-H2}]\text{BAr}^{\text{F}}_{24}$

p20. Figure S20. IR spectra of  $[\text{t-H2}]\text{BAr}^{\text{F}}_{24}$  and  $[\text{t-D2}]\text{BAr}^{\text{F}}_{24}$

p21. Figure S21.  $^{31}\text{P}$  NMR spectrum of  $[\text{t-D2}]\text{BAr}^{\text{F}}_{24}$

p22. Figure S22. IR spectrum of a mixture of  $[\text{t-H2}]\text{BF}_4$  and  $[\mu\text{-H2}]\text{BF}_4$

### **p23. Experimental Details**

#### **p28. Supporting Electrochemical Data**

p28. Figure S23. Scan rate dependence for  $\text{Fe}_2(\text{adt}^{\text{NH}})(\text{CO})_2(\text{dppv})_2$ , **1<sup>NH</sup>**

p29. Figure S24 Cyclic voltammogram of  $\text{Fe}_2(\text{adt}^{\text{NH}})(\text{CO})_2(\text{dppv})_2$ , **1<sup>NH</sup>**

p30. Figure S25. Cyclic voltammogram of  $\text{Fe}_2(\text{pdt})(\text{CO})_2(\text{dppv})_2$ , **2**

p31. Table S1. Electrochemical properties of **1<sup>NH</sup>** and **2**.

p32. Figure S26. Cyclic voltammogram of  $[\text{t-HFe}_2(\text{adt}^{\text{NH}})(\text{CO})_2(\text{dppv})_2]^+$  ( $[\text{t-H1}^{\text{NH}}]^+$ )

p33. Figure S27. Cyclic voltammogram of  $[\text{t-HFe}_2(\text{adt}^{\text{NH}_2})(\text{CO})_2(\text{dppv})_2]^{2+}$  ( $[\text{t-H1}^{\text{NH}_2}]^{2+}$ )

p34. Figure S28. Cyclic voltammogram of  $[\text{Fe}_2(\text{adt}^{\text{NH}})(\mu\text{-H})(\text{CO})_2(\text{dppv})_2]^+$  ( $[\mu\text{-H1}^{\text{NH}}]^+$ )

p35. Figure S29. Cyclic voltammogram of  $[\text{Fe}_2(\text{adt}^{\text{NH}_2})(\mu\text{-H})(\text{CO})_2(\text{dppv})_2]^{2+}$  ( $[\mu\text{-H1}^{\text{NH}_2}]^{2+}$ )

p36. Figure S30. Cyclic voltammogram of  $[\text{t-HFe}_2(\text{pdt})(\text{CO})_2(\text{dppv})_2]^+$  ( $[\text{t-H2}]^+$ )

p37. Figure S31. Cyclic voltammogram of  $[\text{Fe}_2(\text{pdt})(\mu\text{-H})(\text{CO})_2(\text{dppv})_2]^+$  ( $[\mu\text{-H2}]^+$ )

p38. Figure S32. Dependence of  $i_c$  for proton reduction catalysis by  $[\text{t-H1}^{\text{NH}}]^+$  with  $\text{H}_2\text{ClCCOOH}$  on scan rate

p38. Figure S33. Dependence of  $i_c/i_p$  for proton reduction catalysis by  $[\text{t-H1}^{\text{NH}}]^+$  with  $\text{H}_2\text{ClCCOOH}$  on scan rate

- p39. Figure S34. Dependence of  $i_c$  for proton reduction catalysis by  $[t\text{-H1}^{\text{NH}}]^+$  with  $\text{H}_2\text{ClCCOOH}$  on catalyst concentration
- p40. Figure S35. Comparison of  $i$  for oxidation of  $\mathbf{1}^{\text{NH}}$  vs  $i$  for reduction of  $[t\text{-H1}^{\text{NH}}]^+$
- p41. Figure S36. Proton reduction catalysis by  $[t\text{-HFe}_2(\text{adt})(\text{CO})_2(\text{dppv})_2]^+$  ( $[t\text{-H1}^{\text{NH}}]^+$ ) with  $\text{H}_2\text{ClCCOOH}$  in MeCN
- p42. Figure S37. Proton reduction catalysis by  $[t\text{-HFe}_2(\text{adt})(\text{CO})_2(\text{dppv})_2]^+$  ( $[t\text{-H1}^{\text{NH}}]^+$ ) with  $\text{H}_2\text{ClCCOOD}$
- p43. Figure S38. Dependence of  $i_c$  and  $i_c/i_p$  for proton reduction catalysis by  $[t\text{-H1}^{\text{NH}_2^{2+}}]^+$  with  $\text{CF}_3\text{CO}_2\text{H}$  on scan rate
- p44. Figure S39. Proton reduction catalysis by  $[t\text{-Fe}_2(\text{adt}^{\text{NH}_2})(\text{CO})_2(\text{dppv})_2]^{2+}$  ( $[t\text{-H1}^{\text{NH}_2^{2+}}]^+$ ) with  $\text{CF}_3\text{COOD}$
- p45. Figure S40. Proton reduction catalysis by  $[\text{Fe}_2(\text{adt}^{\text{NH}})(\mu\text{-H})(\text{CO})_2(\text{dppv})_2]^+$  ( $[\mu\text{-H1}^{\text{NH}}]^+$ ) with  $\text{H}_2\text{ClCCOOH}$
- p46. Figure S41. Proton reduction catalysis by  $[t\text{-HFe}_2(\text{pdt})(\text{CO})_2(\text{dppv})_2]^+$  ( $[t\text{-H2}^+]$ ) with  $\text{HBF}_4 \cdot \text{Et}_2\text{O}$
- p47. Figure S42. Proton reduction catalysis by  $[\text{Fe}_2(\text{pdt})(\mu\text{-H})(\text{CO})_2(\text{dppv})_2]^+$  ( $[\mu\text{-H2}^+]$ ) with  $\text{H}_2\text{ClCCOOH}$
- p48. Figure S43. Plot of current vs time for controlled-potential electrolysis  $[t\text{-H1}^{\text{NH}}]^+$ .
- p48. Figure S44. Plot of charge vs time for controlled-potential electrolysis  $[t\text{-H1}^{\text{NH}}]^+$ .
- p49. Table S2. Experimental results from controlled-potential electrolysis experiment.
- p50. Figure S45. Plot of current vs time for controlled-potential electrolysis  $[t\text{-H1}^{\text{NH}}]^+$ , including background current subtraction.
- p50. Figure S46. Plot of charge vs time for controlled-potential electrolysis  $[t\text{-H1}^{\text{NH}}]^+$ , including background current subtraction.
- p51. Table S3. Turnover number for catalysis by  $[t\text{-H1}^{\text{NH}}]^+$ , based on controlled-potential electrolysis experiment.

## p. 51. References

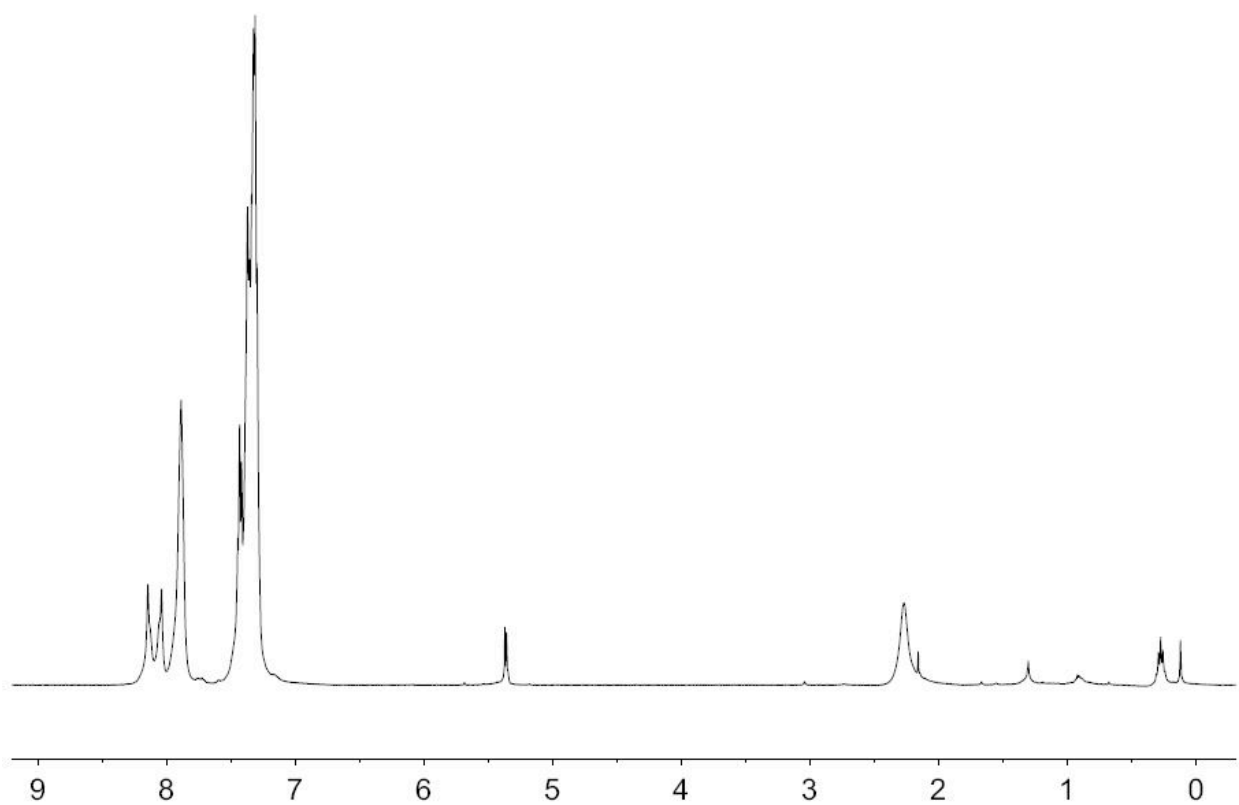

**Figure S1.**  $^1\text{H}$  NMR spectrum of  $\text{Fe}_2(\text{adt}^{\text{NH}})(\text{CO})_2(\text{dppv})_2$ ,  $\mathbf{1}^{\text{NH}}$ .



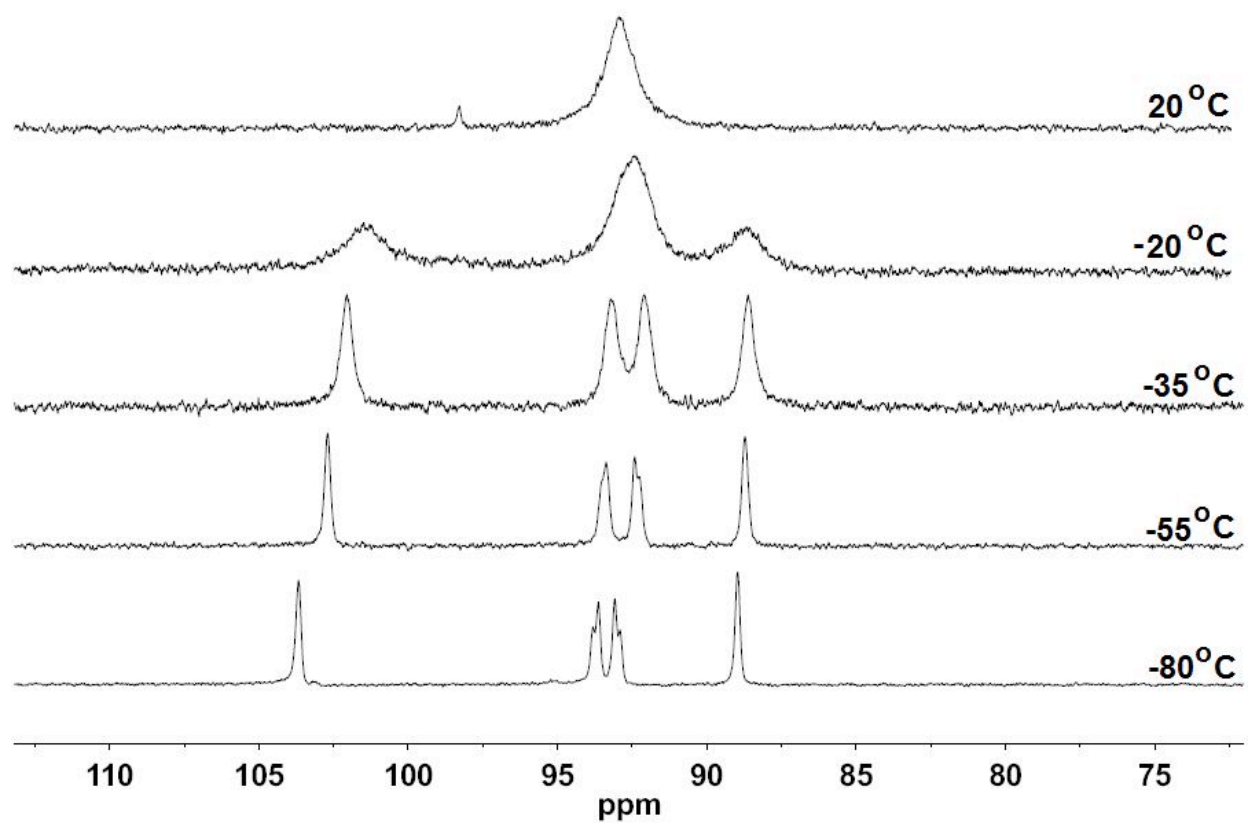

**Figure S2.** Variable temperature  $^{31}\text{P}$  NMR spectrum of  $1^{\text{NH}}$  in  $\text{CD}_2\text{Cl}_2$ .

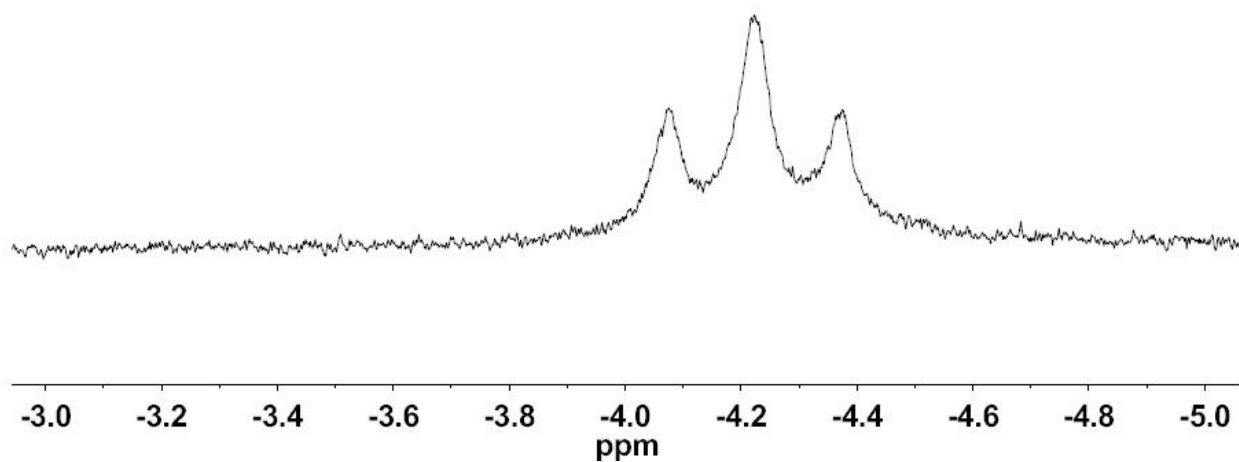

**Figure S3.** High field  $^1\text{H}$  NMR spectrum of  $[t\text{-H}1^{\text{NH}}]\text{BARF}_{24}$  in  $\text{CD}_2\text{Cl}_2$  at  $-80\text{ }^\circ\text{C}$ .

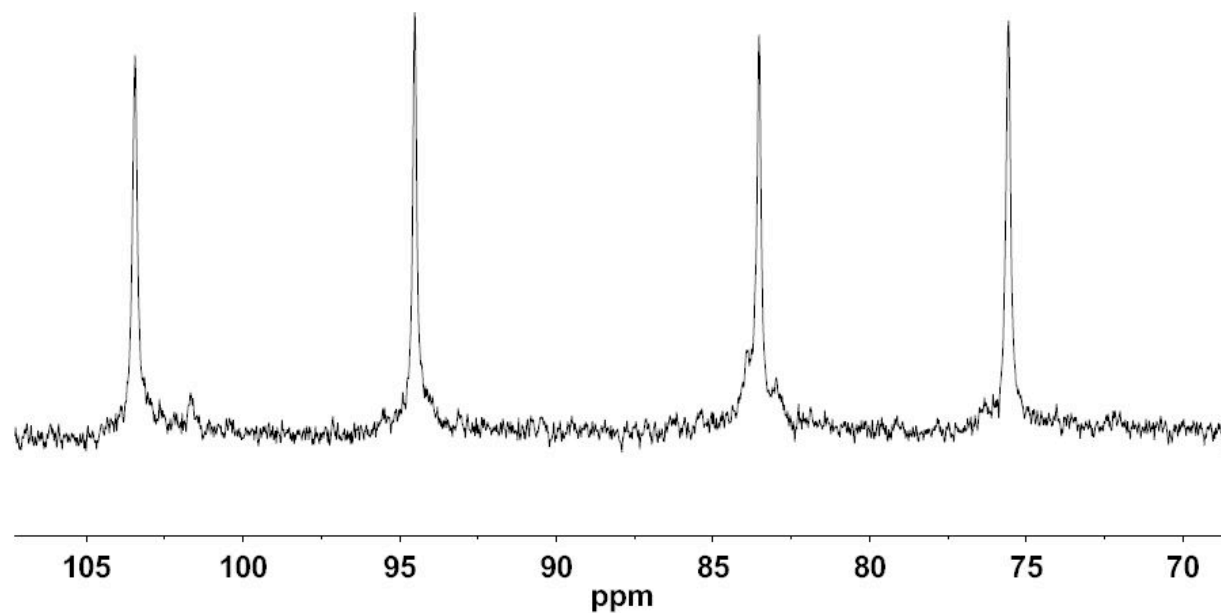

**Figure S4.**  $^{31}\text{P}$  NMR spectrum of  $[t\text{-H}1^{\text{NH}}]\text{BARF}_{24}$  in  $\text{CD}_2\text{Cl}_2$  at  $-80\text{ }^\circ\text{C}$ .

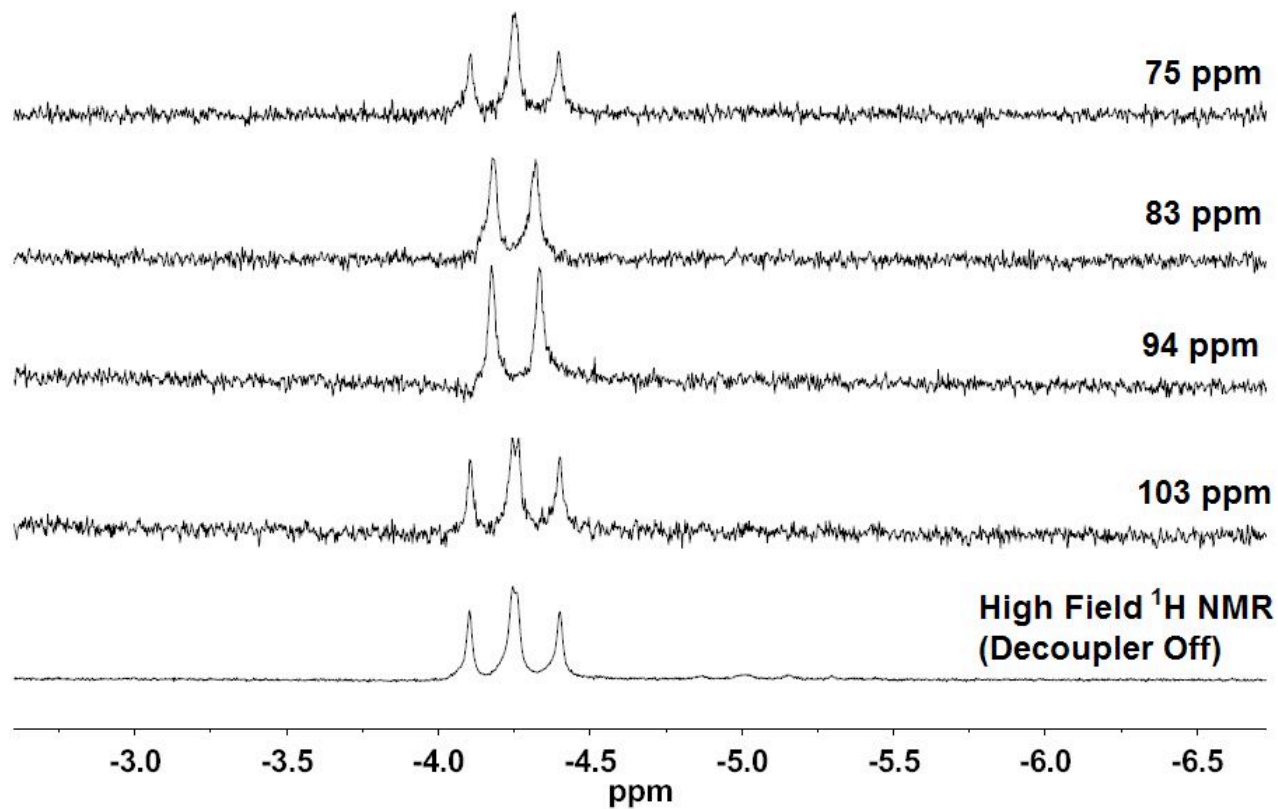

**Figure S5.** High field region of <sup>31</sup>P Decoupled <sup>1</sup>H NMR of [t-H1<sup>NH</sup>]BAr<sup>F</sup><sub>24</sub> (Chemical shift listed corresponds to the <sup>31</sup>P NMR signal to which the spectrum is decoupled)

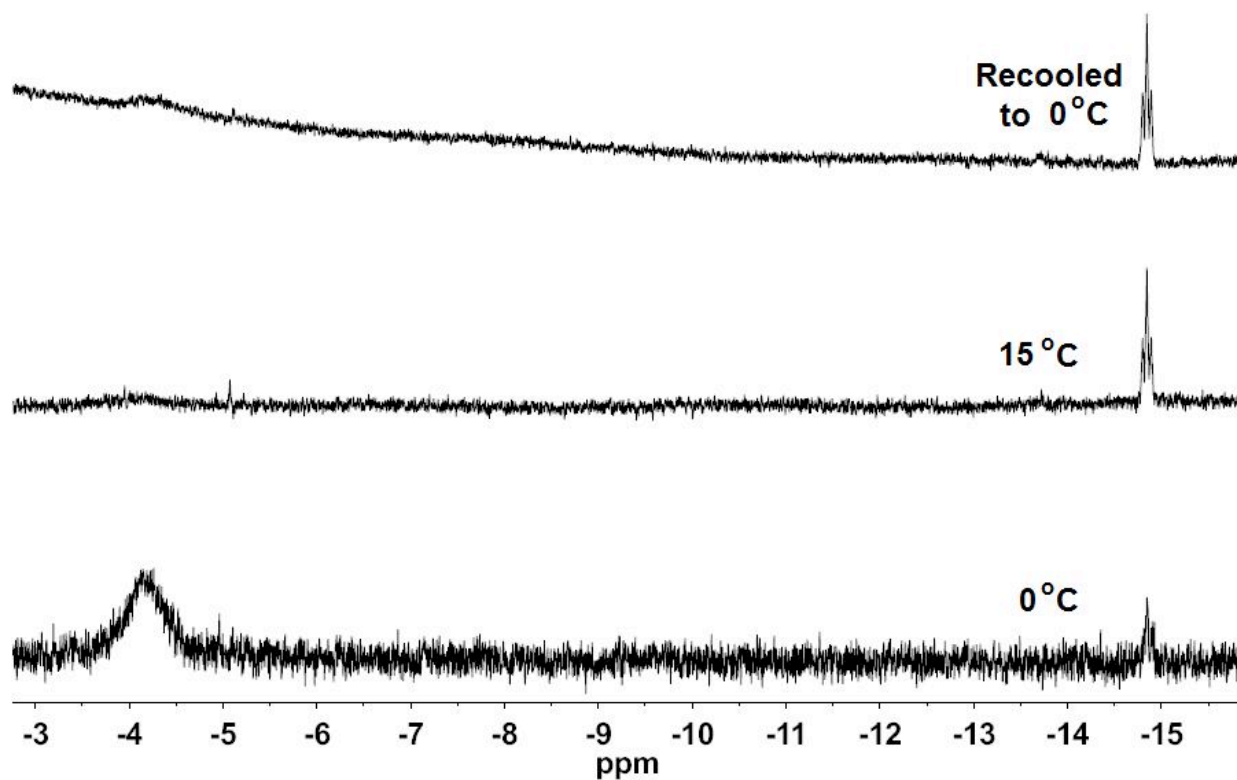

**Figure S6.** High field region <sup>1</sup>H NMR spectra of [*t*-H1<sup>NH</sup>]BAr<sup>F</sup><sub>24</sub> and sym-[*μ*-H1<sup>NH</sup>]BAr<sup>F</sup><sub>24</sub>. At 0 °C [*t*-H1<sup>NH</sup>]BAr<sup>F</sup><sub>24</sub> is the major species. Upon warming to 15 °C, sym-[*μ*-H1<sup>NH</sup>]BAr<sup>F</sup><sub>24</sub> is the major species. Upon recooling to 0 °C, sym-[*μ*-H1<sup>NH</sup>]BAr<sup>F</sup><sub>24</sub> is still the major species, showing that once isomerization to the bridging hydride occurs, the terminal hydride cannot be reformed.

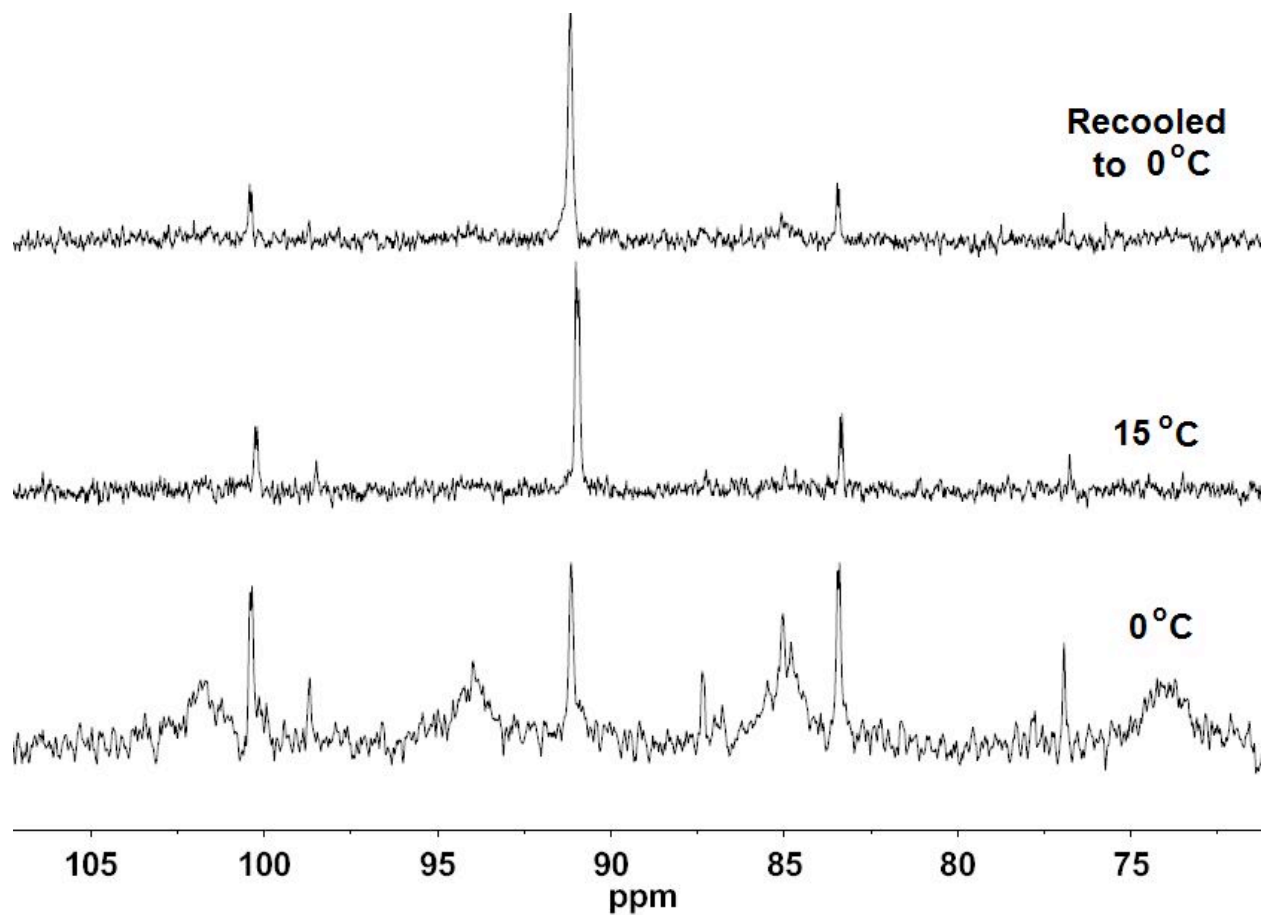

**Figure S7.**  $^{31}\text{P}$  NMR spectra of  $[t\text{-H1}^{\text{NH}}]\text{BAR}^{\text{F}}_{24}$  and  $\text{sym-}[\mu\text{-H1}^{\text{NH}}]\text{BAR}^{\text{F}}_{24}$ . At 0 °C  $[t\text{-H1}^{\text{NH}}]\text{BAR}^{\text{F}}_{24}$  is the major species. Upon warming to 15 °C,  $\text{sym-}[\mu\text{-H1}^{\text{NH}}]\text{BAR}^{\text{F}}_{24}$  is the major species. Upon recooling to 0 °C,  $\text{sym-}[\mu\text{-H1}^{\text{NH}}]\text{BAR}^{\text{F}}_{24}$  is still the major species, showing that once isomerization to the bridging hydride occurs, the terminal hydride cannot be reformed.

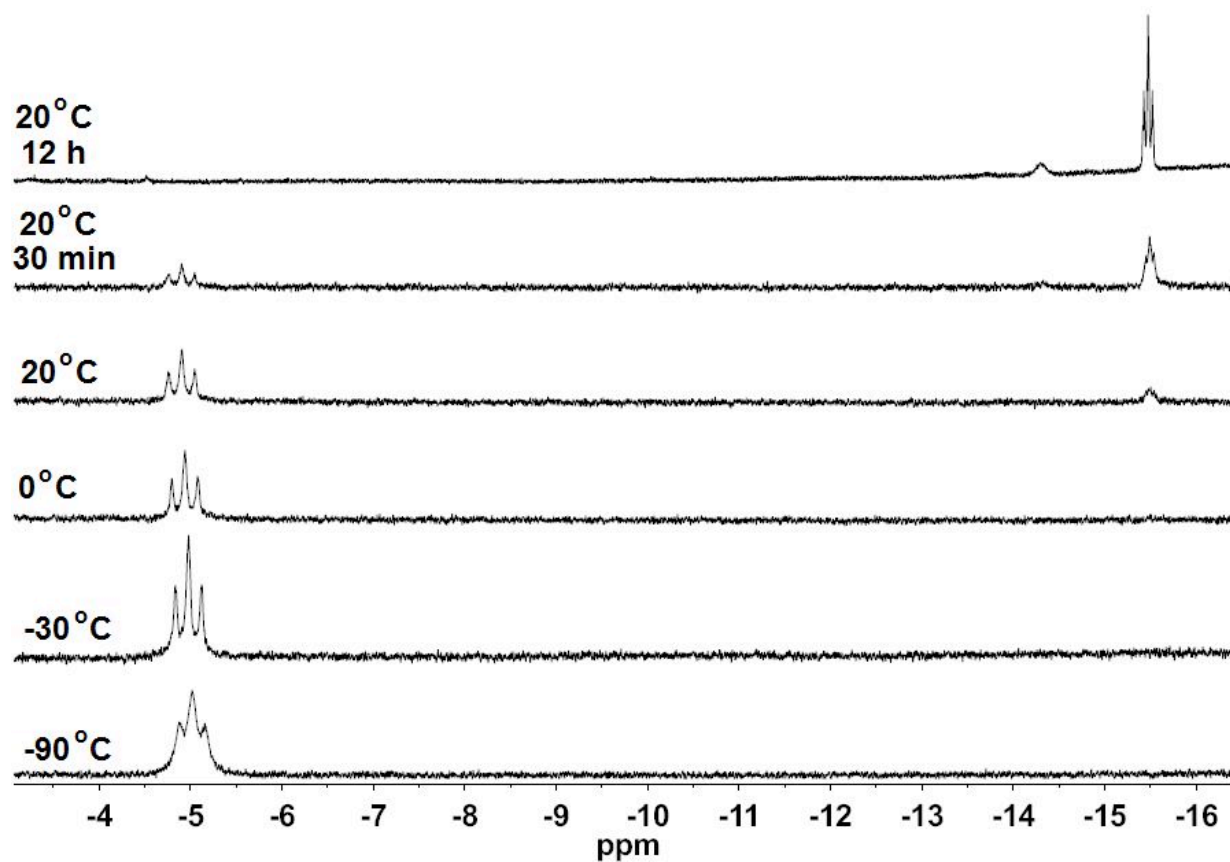

**Figure S8.** Variable temperature high field  $^1\text{H}$  NMR spectrum of  $1^{\text{NH}}$  + 2 equiv  $[\text{H}(\text{Et}_2\text{O})_2]\text{BAr}^{\text{F}}_{24}$  in  $\text{CD}_2\text{Cl}_2$ .

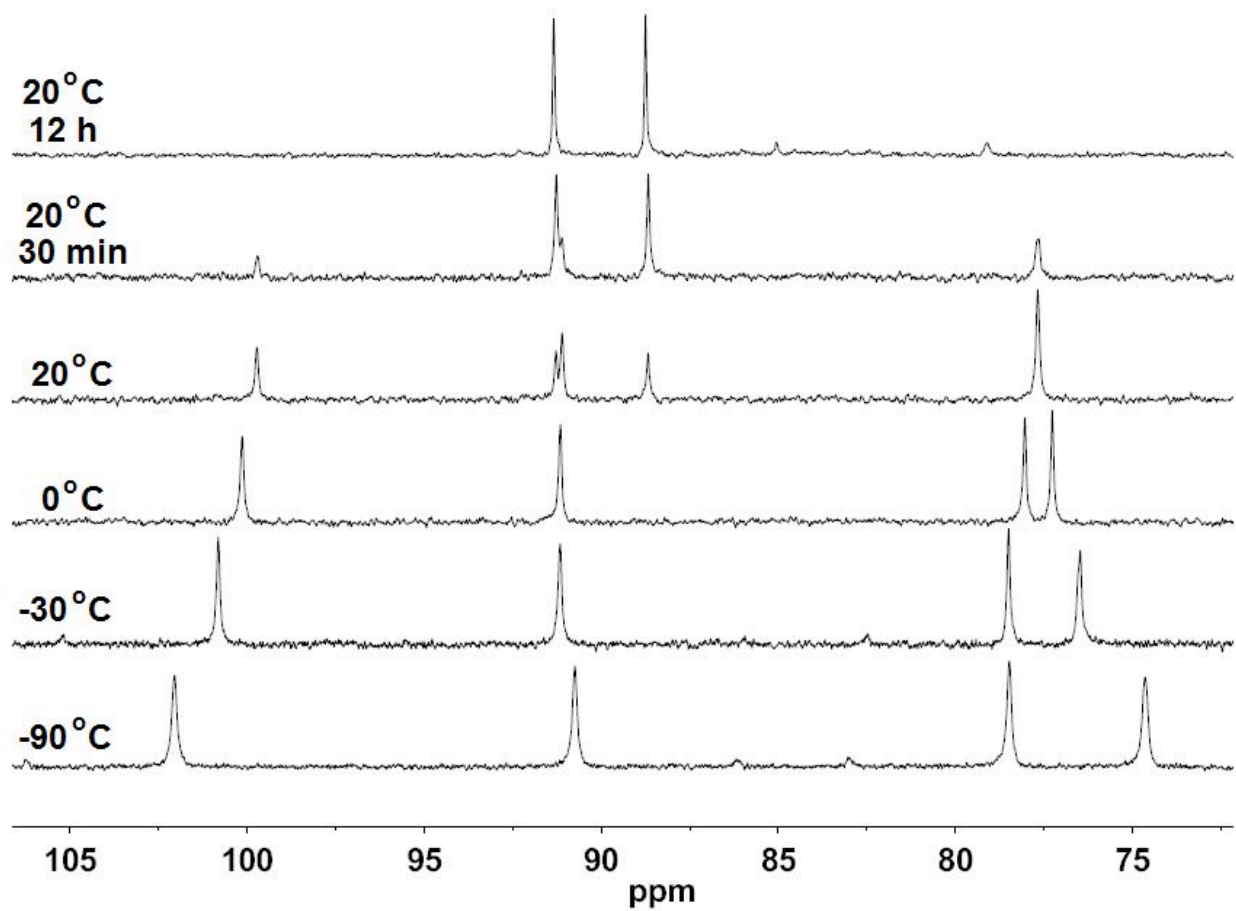

**Figure S9.** Variable temperature  $^{31}\text{P}$  NMR spectrum of  $1^{\text{NH}} + 2$  equiv  $[\text{H}(\text{Et}_2\text{O})_2]\text{BAr}^{\text{F}}_{24}$  in  $\text{CD}_2\text{Cl}_2$ .

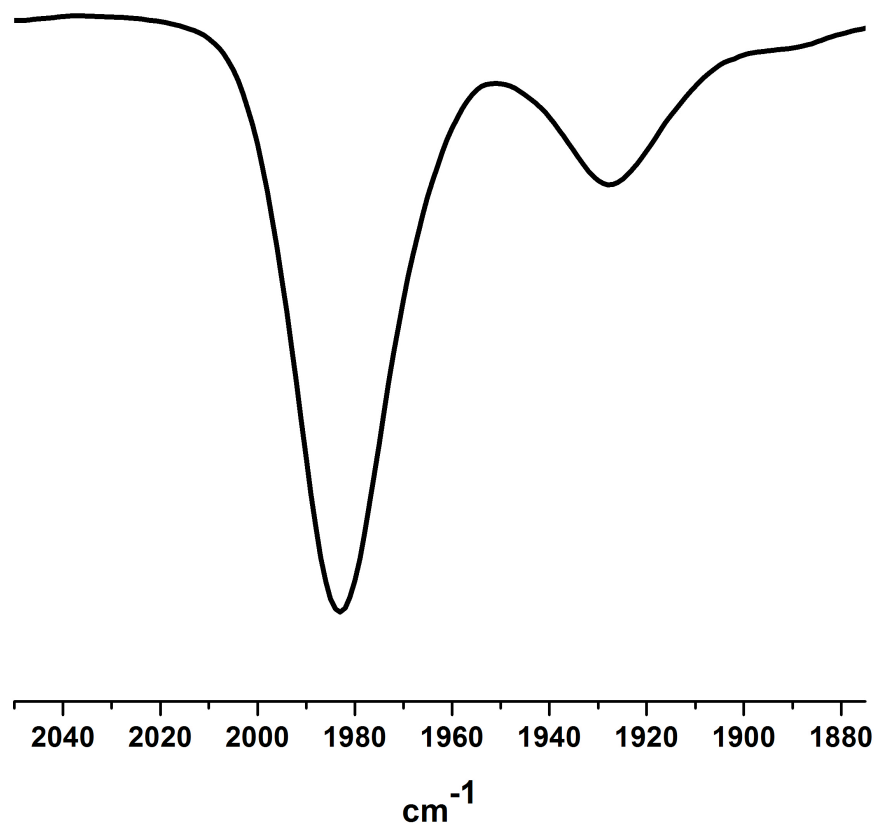

**Figure S10.** IR spectrum of  $[t\text{-H}1^{\text{NH}_2}]^{2+}$  formed by protonation of  $1^{\text{NH}}$  with 2 equivalents of  $\text{HBF}_4 \cdot \text{Et}_2\text{O}$  in  $\text{CH}_2\text{Cl}_2$  at  $0^\circ\text{C}$ .



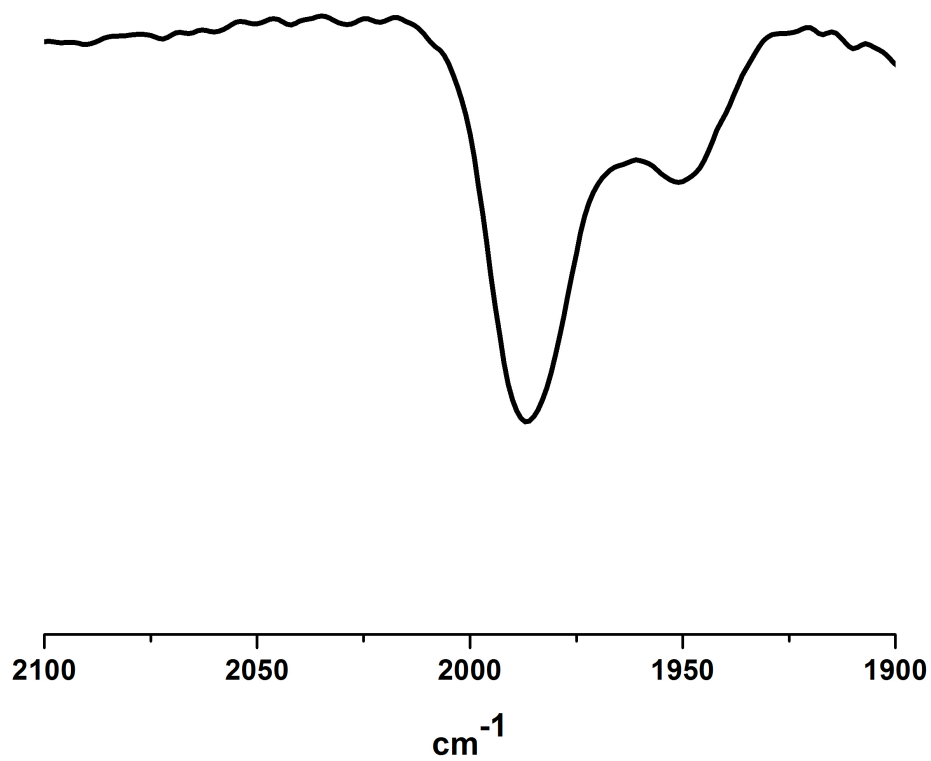

**Figure S11.** IR spectrum of  $[t\text{-H1H}]^{2+}$  formed by protonation of  $1^{\text{NH}}$  with 2 equiv of  $\text{CF}_3\text{COOH}$  in  $\text{CH}_2\text{Cl}_2$  at  $-78^\circ\text{C}$ .

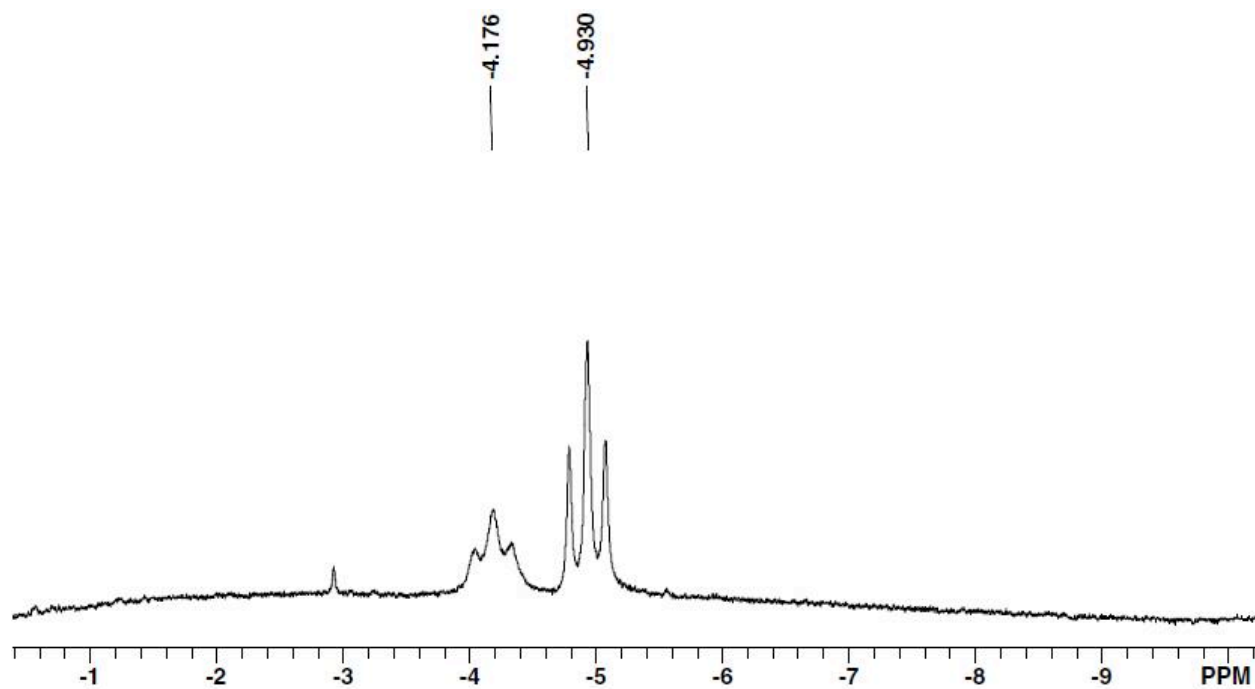

**Figure S12.** High field  $^1\text{H}$  NMR spectra of a mixture of  $[\text{t-H1}^{\text{NH}}]\text{BAr}^{\text{F}}_{24}$  and  $[\text{t-H1}^{\text{NH}_2}](\text{BAr}^{\text{F}}_{24})_2$  in  $\text{CD}_2\text{Cl}_2$  at  $-40\text{ }^\circ\text{C}$ .

a.

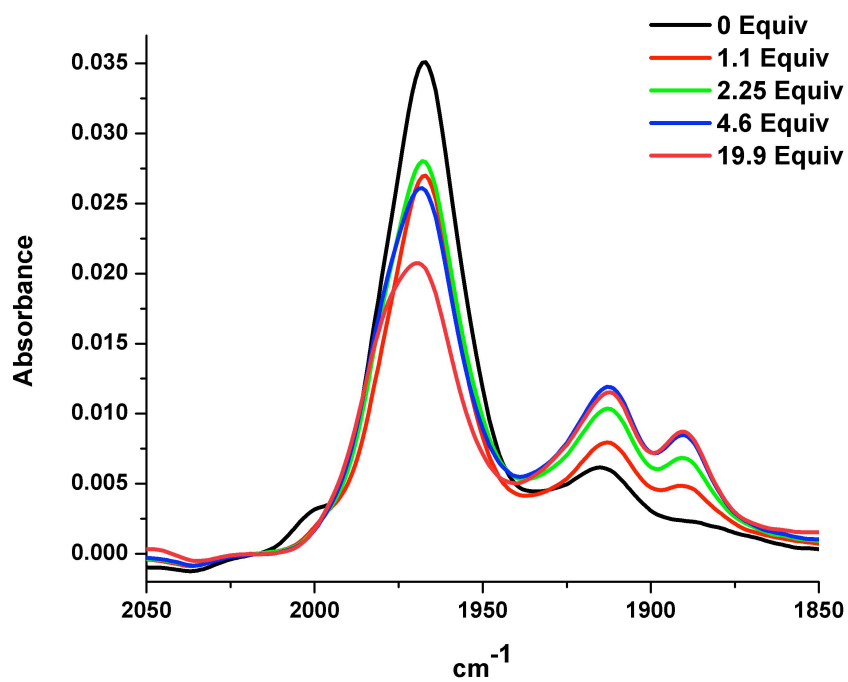

b.

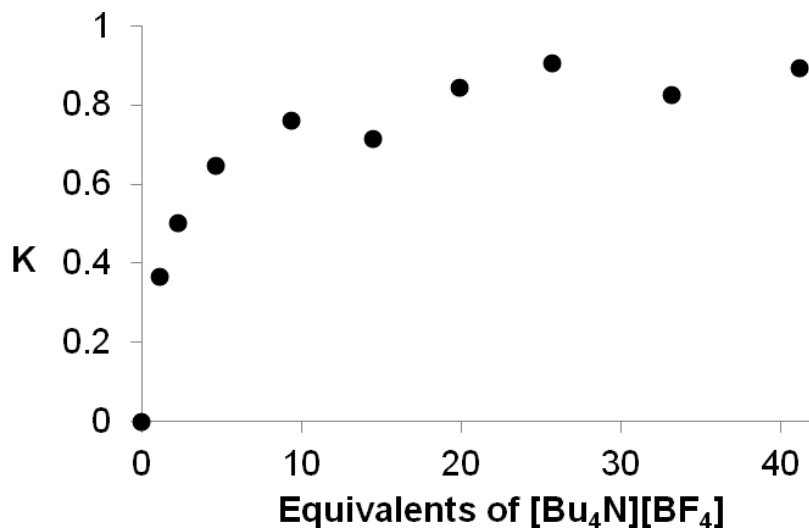

**Figure S13.** a. IR spectra of a solution of  $[\text{t-H1}^{\text{NH}}]\text{BAr}^{\text{F}}_{24}$  with 0, 1, 2, 3, 10 equiv of added  $[\text{Bu}_4\text{N}]\text{BF}_4$  at  $-78^\circ\text{C}$  b. Graph of K (the equilibrium ratio of  $[\text{t-H1}^{\text{NH}}]^+ / [\text{H1}^{\text{NH}}]^+$ ) vs. equivalents  $\text{BF}_4^-$  for a  $\text{CH}_2\text{Cl}_2$  solution of  $[\text{t-H1}^{\text{NH}}]\text{BAr}^{\text{F}}_{24}$ .

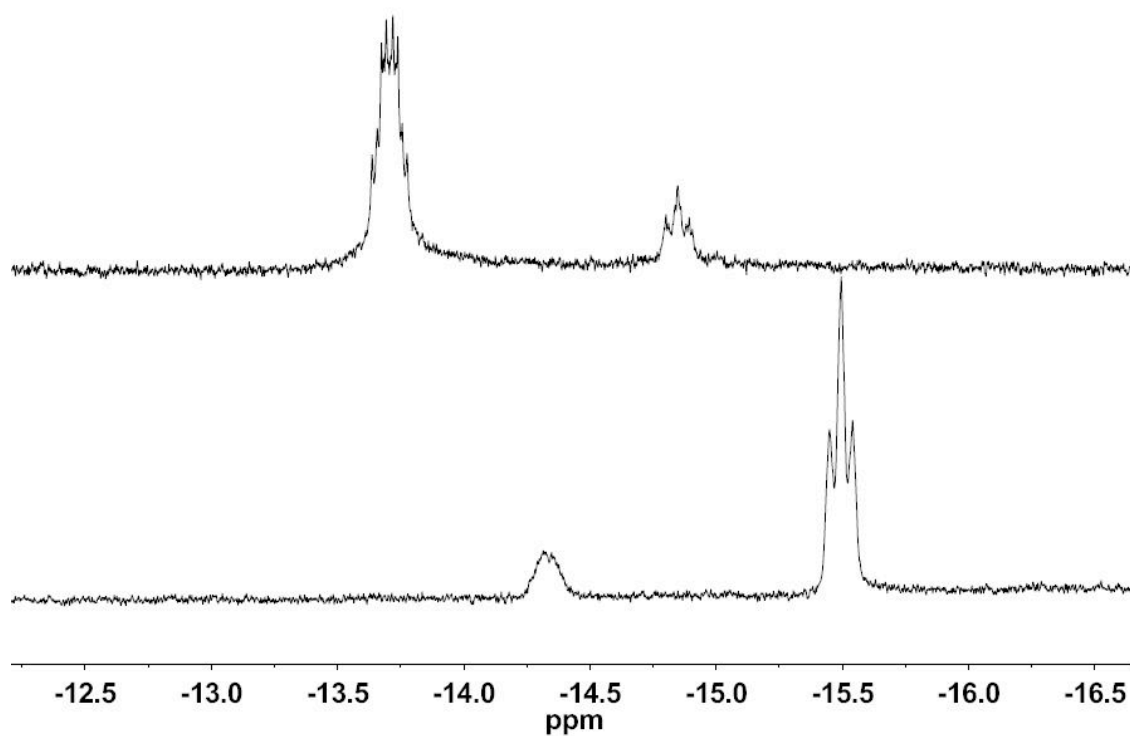

**Figure S14.** High field <sup>1</sup>H NMR spectra of [μ-H1<sup>NH</sup>]<sup>+</sup> (top) and [μ-H1<sup>NH</sup><sub>2</sub>]<sup>2+</sup> (bottom) in CD<sub>2</sub>Cl<sub>2</sub>.

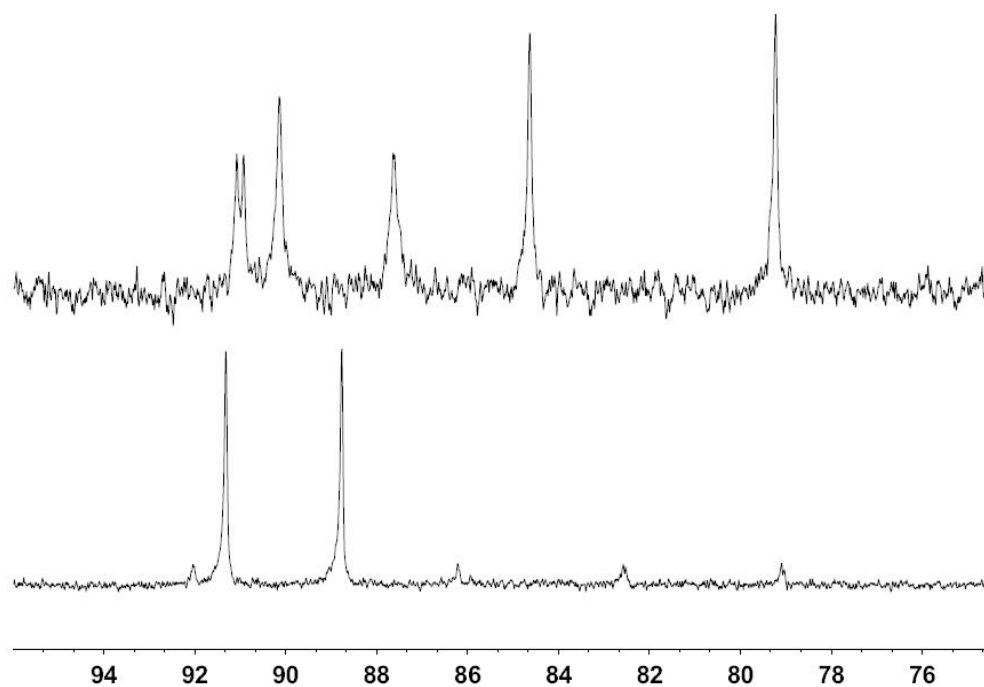

**Figure S15.** <sup>31</sup>P NMR spectra of [μ-H1<sup>NH</sup>]<sup>+</sup> (top) and [μ-H1<sup>NH</sup><sub>2</sub>]<sup>2+</sup> (bottom) in CD<sub>2</sub>Cl<sub>2</sub>.

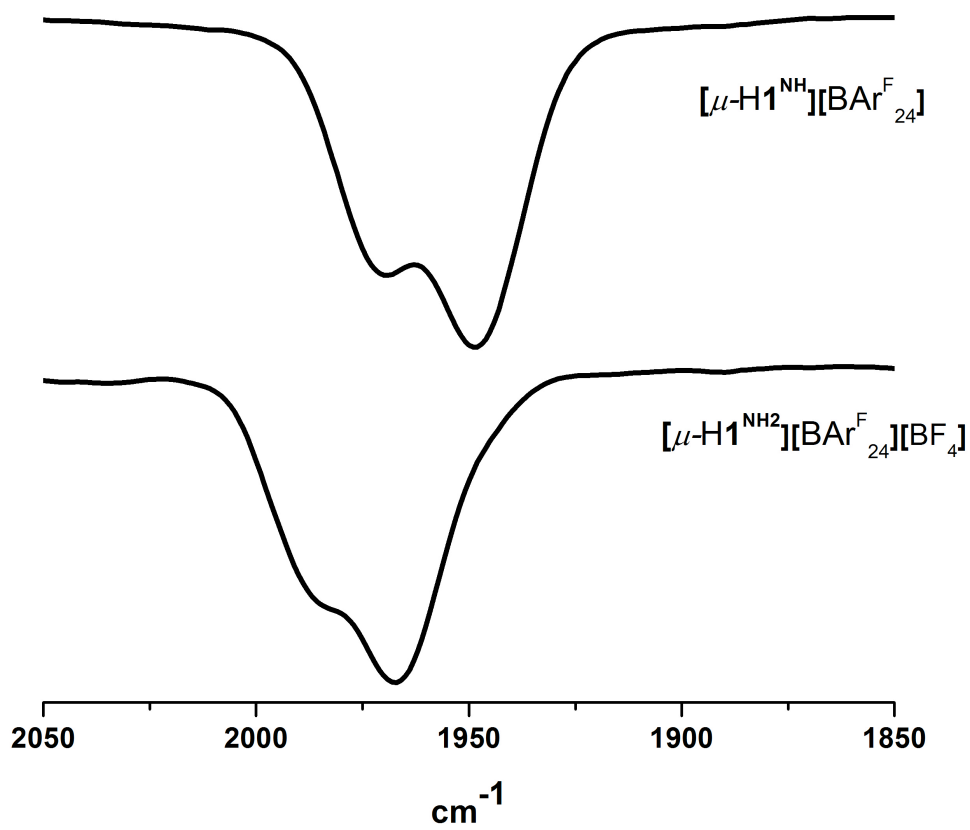

**Figure S16.** IR spectra of  $[\text{Fe}_2(\text{adt}^{\text{NH}})(\mu\text{-H})(\text{CO})_2(\text{dppv})_2]^+$  ( $[\mu\text{-H1}^{\text{NH}}]^+$ ) and  $[\text{Fe}_2(\text{adt}^{\text{NH}_2})(\mu\text{-H})(\text{CO})_2(\text{dppv})_2]^{2+}$  ( $[\mu\text{-H1}^{\text{NH}_2}]^{2+}$ ) in  $\text{CH}_2\text{Cl}_2$

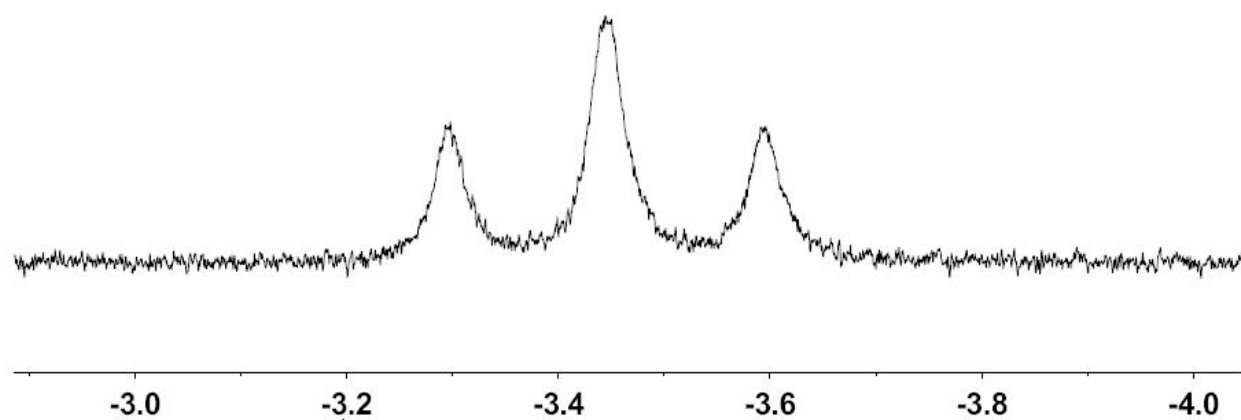

**Figure S17.** High field  $^1\text{H}$  NMR spectra of  $[\text{t-H}_2]^+$  at  $-90\text{ }^\circ\text{C}$  in  $\text{CD}_2\text{Cl}_2$ .

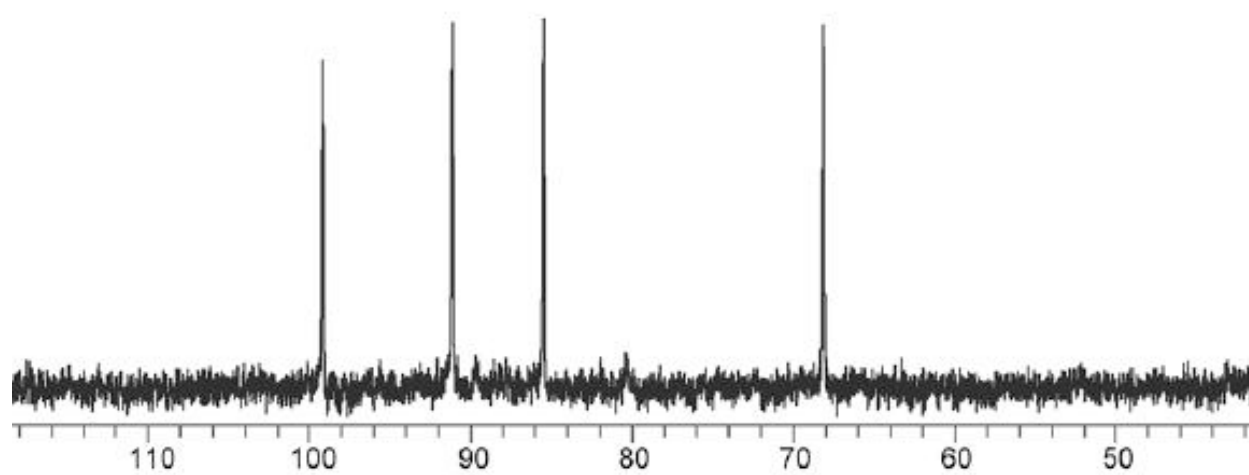

**Figure S18.**  $^{31}\text{P}$  NMR spectra of  $[\text{t-H}_2]^+$  at  $-90\text{ }^\circ\text{C}$  in  $\text{CD}_2\text{Cl}_2$ .

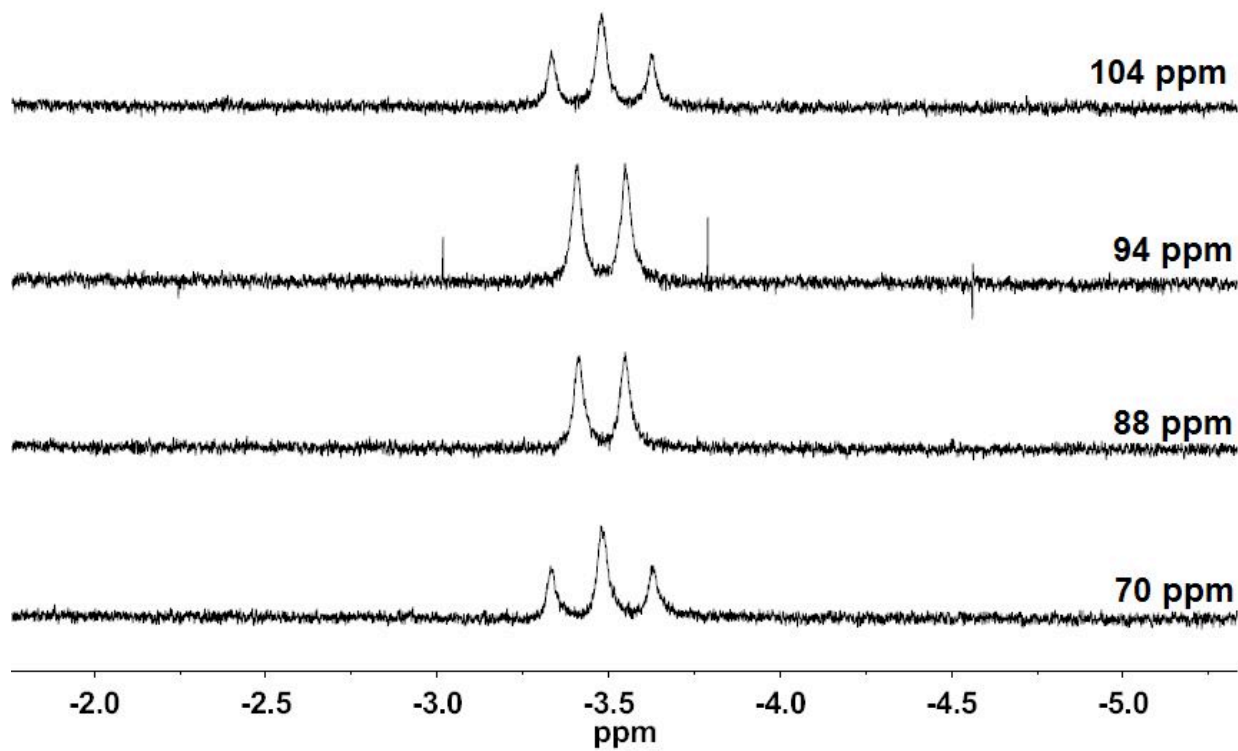

**Figure S19.** High field region of  $^{31}\text{P}$  Decoupled  $^1\text{H}$  NMR of  $[\text{t-H}_2]\text{BAR}^{\text{F}}_{24}$  at  $-90\text{ }^\circ\text{C}$  (Chemical shift listed corresponds to the  $^{31}\text{P}$  NMR signal to which the spectrum is decoupled)

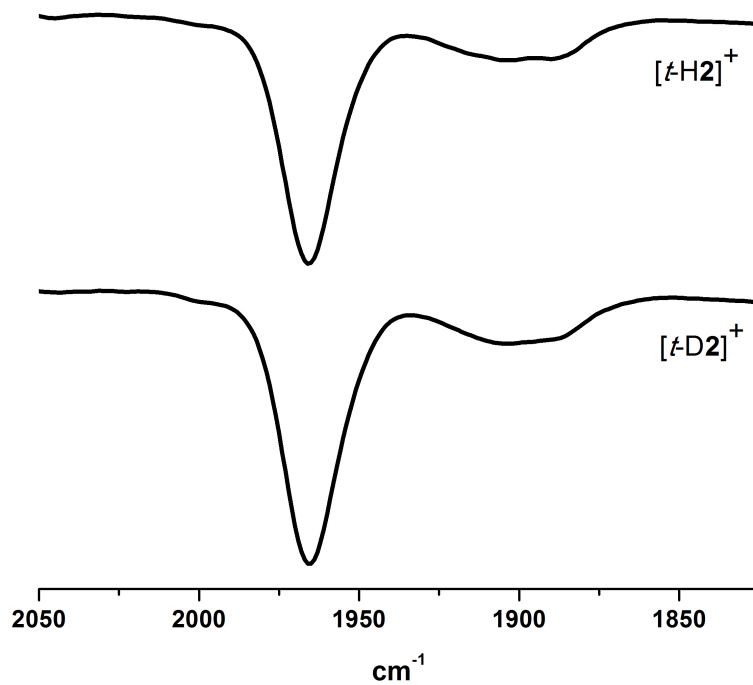

**Figure S20.** IR spectra of [t-H2]<sup>+</sup> and [t-D2]<sup>+</sup> formed by protonation of **2** with excess [H(Et<sub>2</sub>O)<sub>2</sub>]BAr<sup>F</sup><sub>24</sub> and [D(Et<sub>2</sub>O)<sub>2</sub>]BAr<sup>F</sup><sub>24</sub>, respectively, in CH<sub>2</sub>Cl<sub>2</sub> at -78 °C.



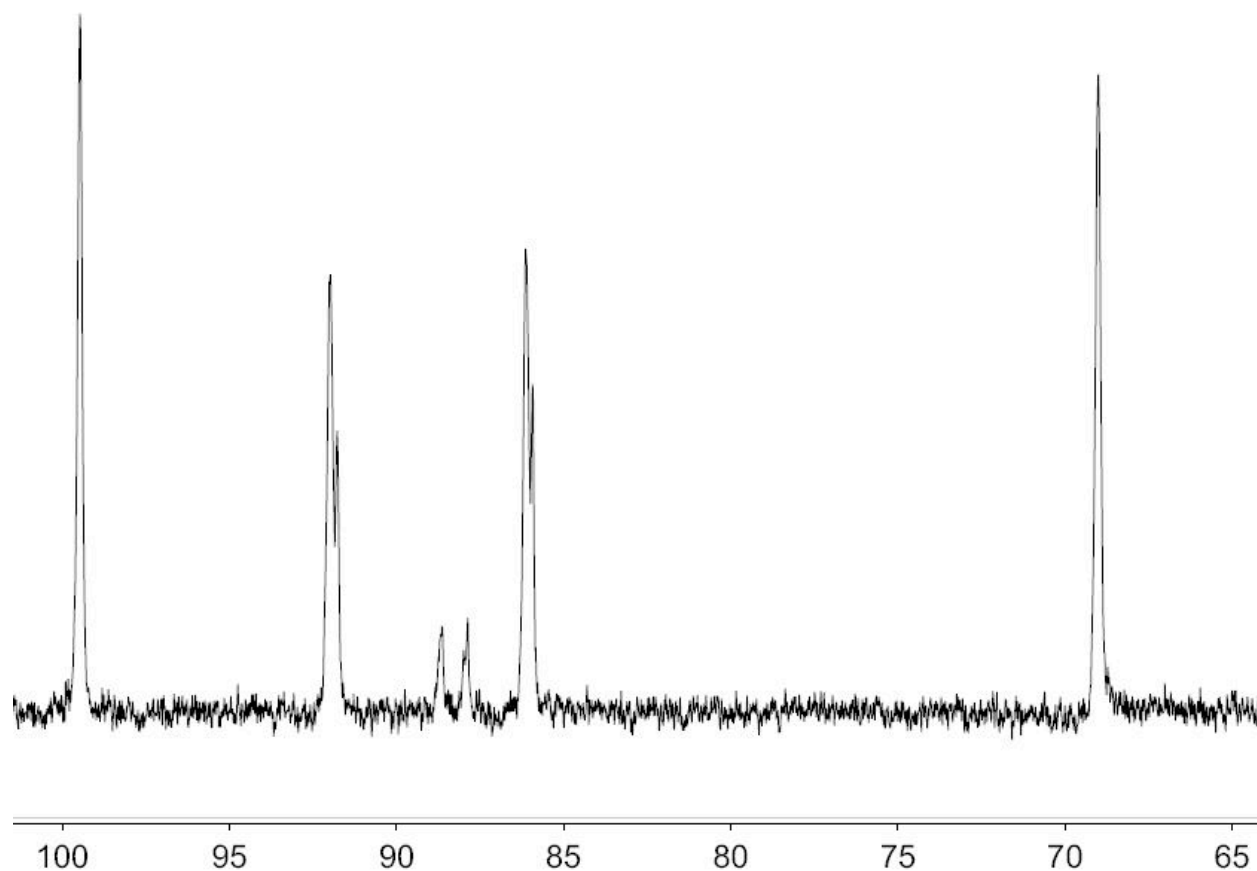

**Figure S21.**  $^{31}\text{P}$  NMR spectrum  $[\textit{t}\text{-D}_2]^+$  at  $-20\text{ }^\circ\text{C}$ , formed by protonation of **2** with excess  $[\text{D}(\text{Et}_2\text{O})_2]\text{BAr}^{\text{F}}_{24}$  in  $\text{CH}_2\text{Cl}_2$ . Splitting of the signals at 86 and 91 ppm is due to coupling of these phosphorus centers with the terminal deuteride. Signals at 88 and 89 ppm are due to the bridging deuteride,  $[\mu\text{-D}_2]^+$ .

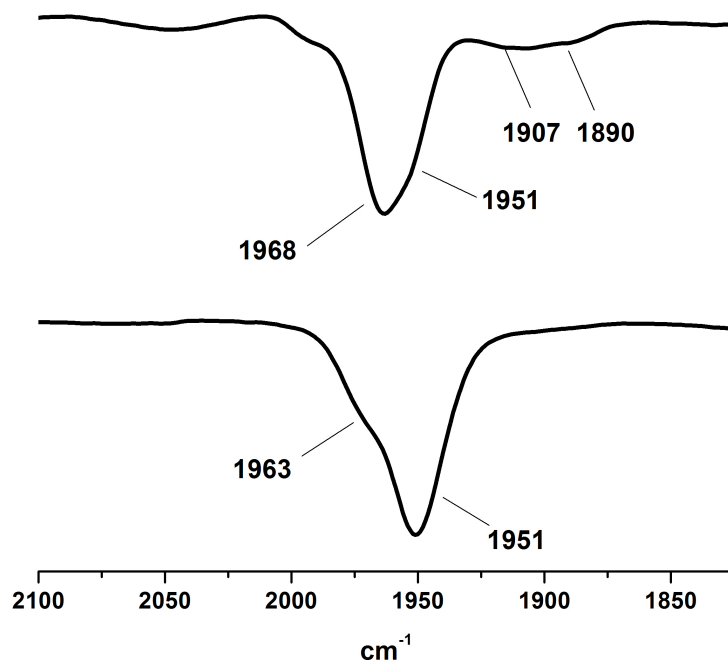

**Figure S22.** Top: IR spectrum of a mixture of  $[t\text{-H}2]^+$  ( $\nu_{\text{CO}} = 1968, 1907, 1890 \text{ cm}^{-1}$ ) and  $[\mu\text{-H}2]^+$  ( $\nu_{\text{CO}} = 1951 \text{ cm}^{-1}$ ) formed by protonation of **2** with excess  $\text{HBF}_4 \cdot \text{Et}_2\text{O}$  at room temperature in  $\text{CH}_2\text{Cl}_2$ . IR spectrum was acquired immediately after addition of acid. Bottom: IR spectrum of mixture after stirring at room temperature overnight, showing that  $[\mu\text{-H}2]^+$  is the only species present.

The IR spectrum of  $[t\text{-H}2]^+$  exhibits a strong band at  $1965 \text{ cm}^{-1}$  (terminal CO),  $1905 \text{ cm}^{-1}$  (bridging CO), and  $1890 \text{ cm}^{-1}$ , which we initially assigned as an Fe-H stretch. However, the deuteride,  $[t\text{-D}2]^+$  has the same IR spectrum (See Figure S20). The  $^{31}\text{P}$  NMR spectrum of  $[t\text{-D}2]^+$  is identical to that for  $[t\text{-H}2]^+$ , except that P-D coupling is apparent. (See Figure S21). The IR spectrum of  $[\mu\text{-H}2]^+$  only contains  $\nu_{\text{CO}} = 1951, 1963 \text{ cm}^{-1}$ , indicating that the bands at  $1890$  and  $1905 \text{ cm}^{-1}$  in the spectrum of  $[t\text{-H}2]^+$  are attributed to the terminal hydride species. We propose that the weak bands at  $1905$  and  $1890 \text{ cm}^{-1}$  are due to the presence of two flippamers and are both due to semi-bridging CO ligands, as shown below.

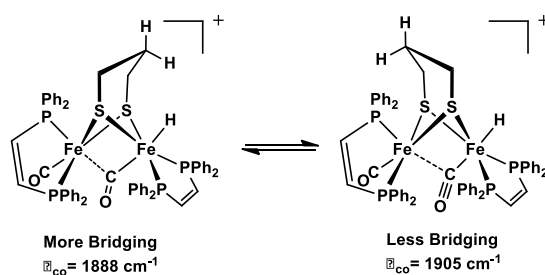

## Experimental Details.

### Determination of $pK_a$ of $[\text{HFe}_2(\text{adt})(\text{CO})_2(\text{dppv}_2)]^+$ .

As discussed in the paper, we estimate the  $pK_a$  of  $[\text{t-H1}^{\text{NH}}]^+$  to be between 15.3 and 17.6, on the MeCN  $pK_a$  scale. A  $pK_a$  scale in  $\text{CD}_2\text{Cl}_2$  has been established for a number of phosphonium tetrafluoroborate salts.<sup>1</sup> At  $-90\text{ }^\circ\text{C}$ ,  $\mathbf{1}^{\text{NH}}$  is protonated by  $[\text{HPMe}_2\text{Ph}]\text{BF}_4$  ( $pK_a^{\text{CD}_2\text{Cl}_2} = 5.7$ ) to form  $[\text{t-H1}^{\text{NH}}]^+$ , but  $\mathbf{1}$  is not protonated by  $[\text{HPBu}_3]\text{BF}_4$  ( $pK_a^{\text{CD}_2\text{Cl}_2} = 8.4$ ). Therefore, on the scale in  $\text{CD}_2\text{Cl}_2$  we can bracket the  $pK_a$  of  $[\text{t-H1}^{\text{NH}}]^+$  between 5.7 and 8.4.

### General Procedures for Proton Reduction Catalysis.

Voltammograms were recorded at varying  $[\text{H}^+]/\text{catalyst}$  ratios. Plots of  $i_c/i_p$  vs equiv of acid, where  $i_c$  is the peak current of the reduction wave in the presence of acid (Eq 1) and  $i_p$  is the peak current in the absence of acid (Eq 2), are initially linear, indicating a second order dependence on acid (i.e. hydrogen evolution occurs via protonation of a metal hydride). At some value of  $[\text{H}^+]$ , these plots reach a “plateau region”, in which the value of  $i_c$ , and therefore  $i_c/i_p$ , no longer increases with increasing amounts of acid. The rate constant deduced for this acid-independent plateau can be evaluated from Eq 3.<sup>2,3</sup> As defined in eq 2, the value of  $i_c$  is independent of scan rate. Studies on the scan rate dependence of  $i_c$  show that scan rate independence is only achieved at scans rates of 0.5 V/s and greater (See Figures S32, 33, 38).

$$i_c = nFA[\text{cat}]\sqrt{D(k[\text{H}^+])} \quad \text{Equation 1}$$

$$i_p = 0.4463FA[\text{cat}]\sqrt{\frac{FvD}{RT}} \quad \text{Equation 2}$$

$$\frac{i_c}{i_p} = \frac{n}{0.4463}\sqrt{\frac{RTk}{Fv}} \quad \text{Equation 3}$$

where  $n = \#$  electrons

$v =$  scan rate in V/s

$F$  = Faraday's constant (96485 C/s)

$R$  = gas constant (8.314 J/mol•K)

$T$  = temperature in K

$k$  = first order rate constant for H<sub>2</sub> evolution in [H<sup>+</sup>]-independent region.

$i_c$  = max. current in presence of acid

$i_p$  = max. current in absence of acid

For this work, overpotential is defined as the difference between the reduction potential of the acid ( $E^{\circ}_{\text{HA}/\text{H}_2}$ ) and the potential at which the catalyst reduces the same acid ( $E_{\text{cat}}$ ).<sup>4,5</sup> For each acid concentration,  $E_{\text{cat}}$ , the maximum of the first derivative of the forward scan minus 15 mV, was determined in the region in which  $i_c$  is linearly dependent on the concentration of acid. The  $E^{\circ}_{\text{cat}}$  value used in overpotential calculations is the average of the values at each acid concentration. The values of  $E^{\circ}_{\text{HA}/\text{H}_2}$  were calculated based on the method from Fourmond et al, with corrections for homoconjugation.<sup>5</sup> When determining the overpotential for  $[\text{t-H}_2]^+$ ,  $E^{\circ}_{\text{HA}/\text{H}_2}$  for HBF<sub>4</sub>•Et<sub>2</sub>O was calculated using a  $pK_a$  value of 2.1, that for perchloric acid.<sup>5</sup> We assume similar dissociation of the two acids.

Determining the overpotential for the systems discussed here is complicated by the fact that catalysis is performed in CH<sub>2</sub>Cl<sub>2</sub> in which the standard reduction potentials of the acids are unknown. Therefore, the overpotentials for catalysis by these diiron hydrides are estimates. Under conditions used for catalysis by  $[\text{t-H1}^{\text{NH}}]^+$ , we found that a Pt electrode catalyzed the reduction of chloroacetic acid at -1.0 V vs Fc<sup>+0</sup>, in good agreement with -1.05 V reported for the reduction of this acid in MeCN solution.<sup>4</sup>

**Scan Rate Dependence for catalysis by  $[\text{t-HFe}_2(\text{adt}^{\text{NH}})(\text{CO})_2(\text{dppv}_2)]^+$ ,  $[\text{t-H1}^{\text{NH}}]^+$ .** A 2-mL CH<sub>2</sub>Cl<sub>2</sub> solution of 1.0 mM **1** (2.1 mg, 0.002 mmol), 0.125 M [Bu<sub>4</sub>N]PF<sub>6</sub>, and a ferrocene reference was cooled to 0 °C and treated with 600 μL of 2.0 M H<sub>2</sub>CICCO<sub>2</sub>H (600 equiv). Cyclic voltammograms were obtained at a range of scan rates (See Figures S32, 33).

**Catalyst Concentration Dependence for  $[\text{t-HFe}_2(\text{adt}^{\text{NH}})(\text{CO})_2(\text{dppv}_2)]^+$ ,  $[\text{t-H1}^{\text{NH}}]^+$ .** A 1.5-mL CH<sub>2</sub>Cl<sub>2</sub> solution of 1.0 mM **1**<sup>NH</sup> (1.5 mg, 0.0015 mmol), 0.125 M

[Bu<sub>4</sub>N]PF<sub>6</sub>, 0.67 M H<sub>2</sub>CIC<sub>2</sub>O<sub>2</sub>H (667 equiv), and a ferrocene reference was cooled to 0 °C. A cyclic voltammogram was obtained at  $v = 1$  V/s. To the solution, 0.5 mL aliquots of a 0.125 M [Bu<sub>4</sub>N]PF<sub>6</sub> were added, and a CV was collected at each concentration (See Figure S34).

**Proton Reduction Catalysis by [t-HFe<sub>2</sub>(adt<sup>NH</sup>)(CO)<sub>2</sub>(dppv<sub>2</sub>)]<sup>+</sup>, [t-H1<sup>NH</sup>]<sup>+</sup>.** A 2-mL CH<sub>2</sub>Cl<sub>2</sub> solution of **1<sup>NH</sup>** (2.0 mg, 0.002 mmol) and [NBu<sub>4</sub>]BAR<sup>F</sup><sub>24</sub> (276 mg, 0.25 mmol) was cooled to 0 °C. A CV was recorded in the absence of acid, in order to obtain a value for  $i_p$ . The solution was then treated with aliquots of a 2 M solution of HCl<sub>2</sub>CCO<sub>2</sub>H in CH<sub>2</sub>Cl<sub>2</sub> via a micropipette. After each addition, a CV was collected at  $v = 0.5$  V/s, and the value of  $i_c$  was recorded. Addition of acid continued until the value of  $i_c/i_p$  remained constant. A similar experiment was performed in MeCN solution, in which case, a second reduction wave is observed at -1.8 V that also increases with addition of acid. The species responsible for this wave is unknown (See Figure S36).

**Proton Reduction Catalysis by [t-DFe<sub>2</sub>(adt<sup>NH</sup>)(CO)<sub>2</sub>(dppv<sub>2</sub>)<sub>2</sub>]<sup>+</sup>, [t-D1<sup>NH</sup>]<sup>+</sup>.** A 2-mL CH<sub>2</sub>Cl<sub>2</sub> solution of **1<sup>NH</sup>** (2.0 mg, 0.002 mmol) and [NBu<sub>4</sub>]BAR<sup>F</sup><sub>24</sub> (276 mg, 0.25 mmol) was cooled to 0 °C. A CV was recorded in the absence of acid, in order to obtain a value for  $i_p$ . The solution was then treated with aliquots of a 1 M solution of HCl<sub>2</sub>CCO<sub>2</sub>H in CH<sub>2</sub>Cl<sub>2</sub> via a micropipette. After each addition, a CV was collected at  $v = 0.5$  V/s, and the value of  $i_c$  was recorded. Addition of acid continued until the value of  $i_c/i_p$  remained constant (See Figure S37).

**Scan Rate Dependence for catalysis by [t-HFe<sub>2</sub>(adt<sup>NH2</sup>)(CO)<sub>2</sub>(dppv<sub>2</sub>)]<sup>2+</sup>, [t-H1<sup>NH2</sup>]<sup>2+</sup>.** A 2.5-mL CH<sub>2</sub>Cl<sub>2</sub> solution of 0.6 mM **1** (1.5 mg, 0.0015 mmol), 0.1 M [Bu<sub>4</sub>N]PF<sub>6</sub>, and a ferrocene reference was cooled to 0 °C and treated with 125 μL of CF<sub>3</sub>CO<sub>2</sub>H (1200 equiv). Cyclic voltammograms were obtained at a range of scan rates (See Figures S38).

**Proton Reduction Catalysis by [t-HFe<sub>2</sub>(adt<sup>NH2</sup>)(CO)<sub>2</sub>(dppv<sub>2</sub>)<sub>2</sub>]<sup>2+</sup>, [t-H1<sup>NH2</sup>]<sup>2+</sup>.** A 2-mL CH<sub>2</sub>Cl<sub>2</sub> solution of **1** (2.0 mg, 0.002 mmol) and [NBu<sub>4</sub>]BAR<sup>F</sup><sub>4</sub> (414 mg, 0.37 mmol) was cooled to 0 °C. A CV was recorded in the absence of acid, in order to obtain a value for  $i_p$ . The solution was then treated with aliquots of a 5 M solution of CF<sub>3</sub>CO<sub>2</sub>H in

CH<sub>2</sub>Cl<sub>2</sub> via a micropipette. After each addition, a CV was collected at  $v = 0.25$  V/s, and the value of  $i_c$  was recorded. Addition of acid continued until the value of  $i_c/i_p$  remained constant.

**Proton Reduction Catalysis by [t-DFe<sub>2</sub>(adt<sup>ND</sup>)(CO)<sub>2</sub>(dppv)<sub>2</sub>]<sup>2+</sup>, [t-D1<sup>ND</sup>]<sup>2+</sup>.** A 3-mL CH<sub>2</sub>Cl<sub>2</sub> solution of **1<sup>NH</sup>** (2.0 mg, 0.002 mmol) and [NBu<sub>4</sub>]BAr<sup>F</sup><sub>4</sub> (166 mg, 0.15 mmol) was cooled to 0 °C. A CV was recorded in the absence of acid, in order to obtain a value for  $i_p$ . The solution was then treated with aliquots of a 1.8 M solution of CF<sub>3</sub>CO<sub>2</sub>D in CH<sub>2</sub>Cl<sub>2</sub> via a micropipette. After each addition, a CV was collected at  $v = 0.25$  V/s, and the value of  $i_c$  was recorded. Addition of acid continued until the value of  $i_c/i_p$  remained constant. (See Figure S39).

**Proton Reduction Catalysis by [Fe<sub>2</sub>(adt<sup>NH</sup>)(μ-H)(CO)<sub>2</sub>(dppv)<sub>2</sub>]BAr<sup>F</sup><sub>4</sub>, [μ-H1<sup>NH</sup>]BAr<sup>F</sup><sub>24</sub>.** A 5-mL CH<sub>2</sub>Cl<sub>2</sub> solution of [μ-H1<sup>NH</sup>]BAr<sup>F</sup><sub>24</sub> (9.7 mg, 0.005 mmol) and [NBu<sub>4</sub>]PF<sub>6</sub> (193 mg, 0.5 mmol) was cooled to 0 °C. A CV was collected in the absence of acid, in order to obtain a value for  $i_p$ . The solution was then treated with aliquots of a 0.25 M solution of HCl<sub>2</sub>CCO<sub>2</sub>H in CH<sub>2</sub>Cl<sub>2</sub> via a micropipette. After each addition, a CV was collected at  $v = 0.1$  V/s, and the value of  $i_c$  was recorded. Addition of acid continued until the value of  $i_c/i_p$  remained constant (See Figure S40).

**Proton Reduction Catalysis by [t-HFe<sub>2</sub>(pdt)(CO)<sub>2</sub>(dppv)<sub>2</sub>]<sup>+</sup>, [t-H2]<sup>+</sup>.** A 4-mL CH<sub>2</sub>Cl<sub>2</sub> solution of **2** (4.3 mg, 0.004 mmol) and [Bu<sub>4</sub>N]PF<sub>6</sub> (308 mg, 0.0.8 mmol) was cooled to 0 °C. The solution was then treated with aliquots of a 0.2 M solution of HBF<sub>4</sub>·Et<sub>2</sub>O in CH<sub>2</sub>Cl<sub>2</sub> via a micropipette. After each addition, a CV was collected at  $v = 0.5$  V/s, and the value of  $i_c$  was recorded. Addition of acid continued until the value of  $i_c/i_p$  remained constant. As the concentration of acid increased, a wave at more negative potential appears, but this is attributed to reduction of protons directly at the glassy carbon electrode (See Figure S41).

**Proton Reduction Catalysis by [Fe<sub>2</sub>(pdt)(μ-H)(CO)<sub>2</sub>(dppv)<sub>2</sub>]PF<sub>6</sub>, [μ-H2]PF<sub>6</sub>.** A 5-mL CH<sub>2</sub>Cl<sub>2</sub> solution of [μ-H2]PF<sub>6</sub> (9.7 mg, 0.005 mmol) and [Bu<sub>4</sub>N]PF<sub>6</sub> (193 mg, 0.5 mmol) was cooled to 0 °C. A CV was collected in the absence of acid, in order to obtain a value for  $i_p$ . The solution was then treated with aliquots of a 0.25 M solution of

$\text{HCl}_2\text{CCO}_2\text{H}$  in  $\text{CH}_2\text{Cl}_2$  via a micropipette. After each addition, a CV was collected at  $n = 0.1$  V/s, and the value of  $i_c$  was recorded. Addition of acid continued until the value of  $i_c/i_p$  remained constant (See Figure S42).

**Controlled-potential electrolysis of  $[\text{t-HFe}_2(\text{adt}^{\text{NH}})(\text{CO})_2(\text{dppv})_2]^+$ ,  $[\text{t-H1}^{\text{NH}}]^+$ .** A two compartment electrolysis cell was used, in which the compartments were separated by a medium glass frit. The main compartment contained three necks, which were fitted with a septum, a reticulated vitreous carbon working electrode (1 cm x 1cm x 0.5 cm) connected to Nichrome wire by Ag epoxy), and a Ag/AgNO<sub>3</sub> reference electrode (contained in a Vycor fritted glass tube). The second compartment consists of a glass tube that was fitted with a Pt wire counter electrode.

To the main and Pt compartments of the cell, 10 mL and 7 mL, respectively, of a  $\text{CH}_2\text{Cl}_2$  solution of 0.1 M  $[\text{Bu}_4\text{N}]\text{PF}_6$  / 0.01 M  $\text{ClCH}_2\text{CO}_2\text{H}$  was added. The solution was cooled to 0 °C in an ice bath, and 100 mL of  $\text{CH}_4$  was injected as an internal standard. The solution was then electrolyzed at -1.8 V vs  $\text{Fc}^{+/0}$ , until the current remained constant (~ 700 s, 0.21 mA). At this point,  $\mathbf{1}^{\text{NH}}$  (0.005 mmol) was added to the cell, causing the current to increase to 1.1 mA. The current gradually decreased, and after 6500 s it was within 5% of the background current. Upon addition of 0.1 mmol of  $\text{ClCH}_2\text{CO}_2\text{H}$  (0.2 mL of 0.5 M stock solution), the current once again increased to 1.1 mA and gradually decreased.

During the first 6500 s of the experiment, 500  $\mu\text{L}$  of headspace was periodically removed through the septum, using a Hamilton 500  $\mu\text{L}$  gas-tight syringe, and injected on an Agilent 7820A gas chromatograph. The experimental yield of  $\text{H}_2$  was calculated based on the areas of the  $\text{H}_2$  and  $\text{CH}_4$  peaks. The average current efficiency was calculated to be  $99 \pm 12$  %.

Based on initial electrolysis in the absence of catalyst, 0.21 mA of the total current is due to reduction of protons at the carbon working electrode. Therefore, in turnover number calculations, 0.21 mA was subtracted from the total current, in order to calculate the charge passed due to the catalyst, and therefore the total amount of  $\text{H}_2$  produced by the catalyst.

## Supporting Electrochemical Data

a.

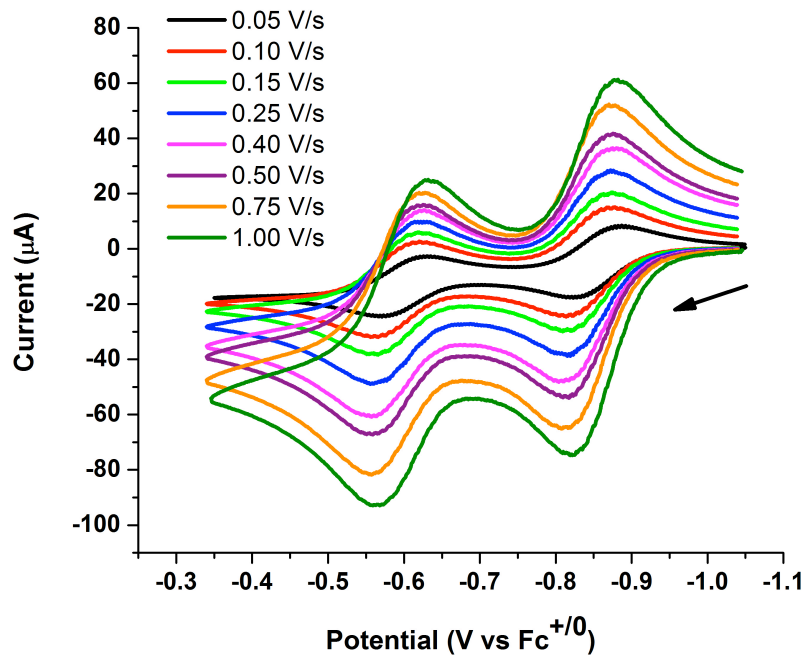

b.

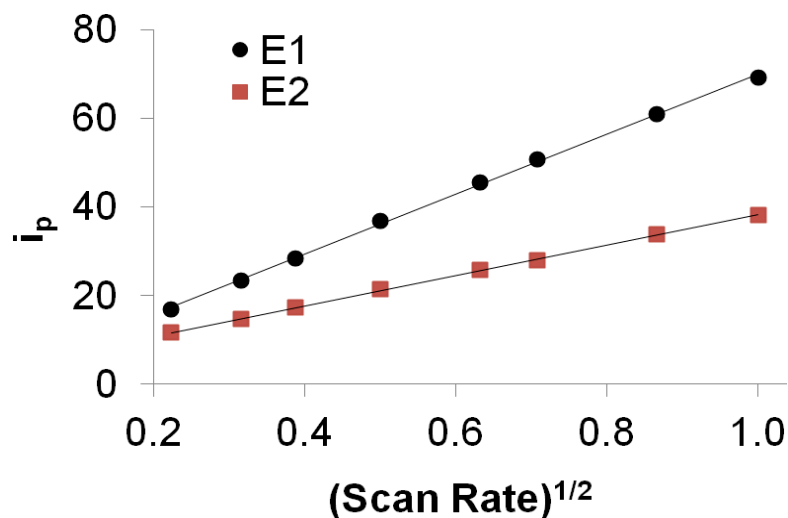

**Figure S23.** a. Cyclic voltammograms of  $1^{NH}$  at varying scan rates. (Conditions: 0.125 M  $[Bu_4N][BArF_{24}]$  in  $CH_2Cl_2$ , 1.0 mM  $1^{NH}$ , GC working electrode, Pt counter electrode, Ag wire pseudo reference electrode, Fc internal standard) b. Plot of  $i_p$  vs. square root of scan rate for  $1^{NH}$ .



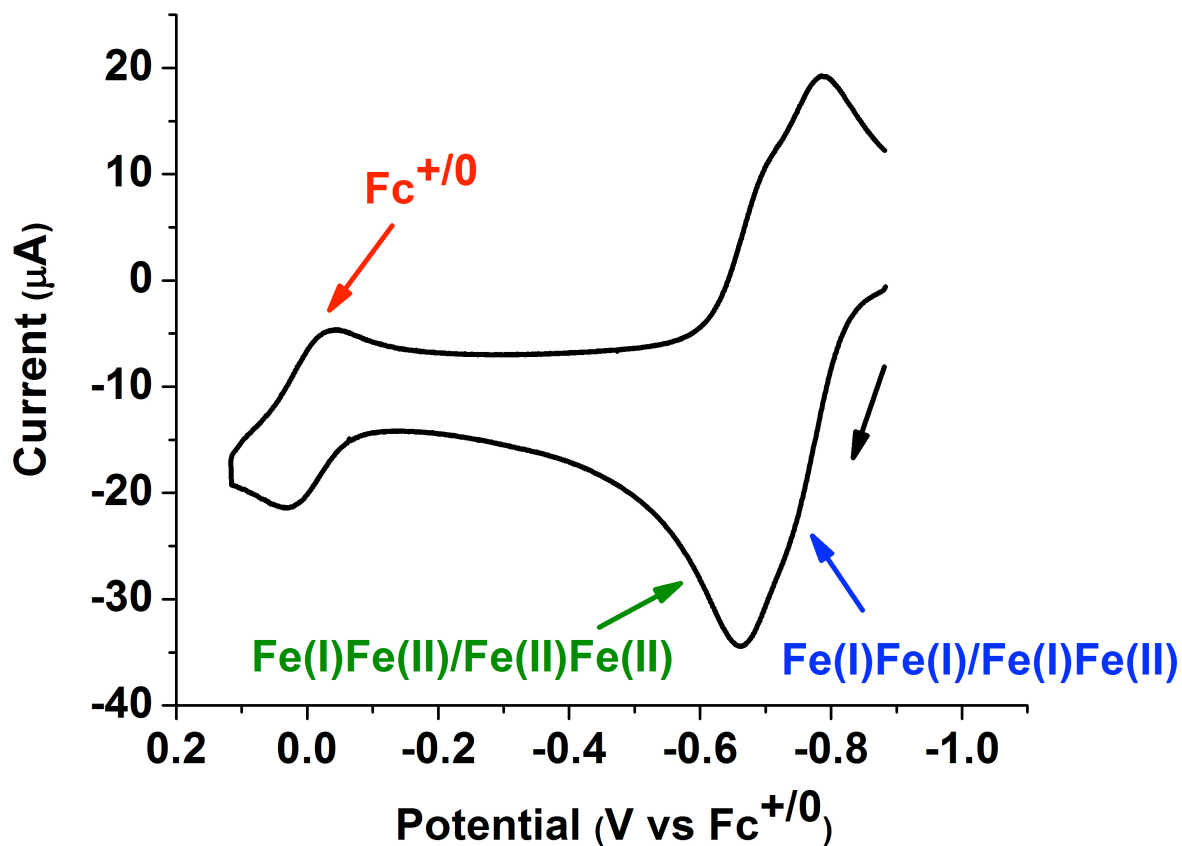

**Figure S24.** Cyclic voltammogram of  $1^{\text{NH}}$ , with  $[\text{Bu}_4\text{N}]\text{PF}_6$  as supporting electrolyte. (Conditions: 0.1M  $[\text{Bu}_4\text{N}]\text{PF}_6$  in  $\text{CH}_2\text{Cl}_2$ , 1.0 mM  $1^{\text{NH}}$ , GC working electrode, Pt counter electrode, Ag wire pseudo reference electrode, Fc internal standard)

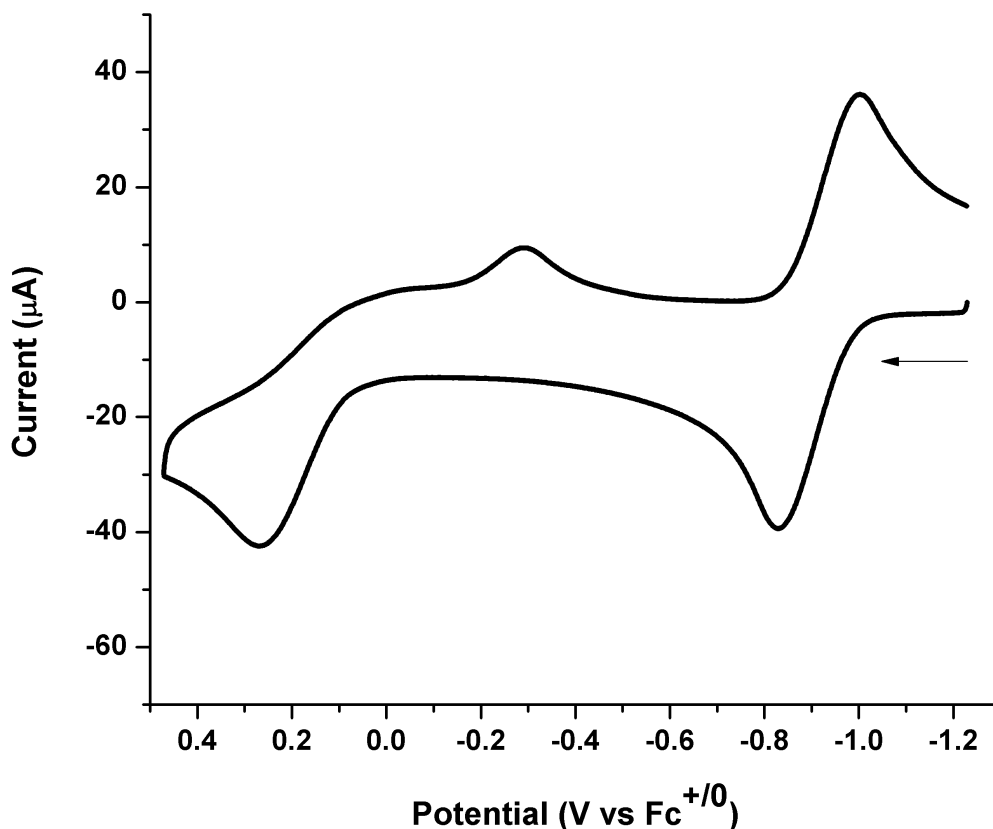

**Figure S25.** Cyclic voltammograms of **2**. (Conditions: 0.025 M [Bu<sub>4</sub>N][BArF<sub>24</sub>] in CH<sub>2</sub>Cl<sub>2</sub>, 1.0 mM **1**, GC working electrode, Pt counter electrode, Ag wire pseudo reference electrode, Fc internal standard)

The couples [1<sup>NH</sup>]<sup>0/+</sup> and [2]<sup>0/+</sup> are reversible and occur at highly negative potentials (all potentials are referenced to Fc<sup>0/+</sup>). A quasi-reversible [2]<sup>+2+</sup> couple occurs at a potential ~1 V positive of the first oxidation, whereas [1<sup>NH</sup>]<sup>+2+</sup> couple is within 224 mV of the first oxidation. This small  $\Delta E_{1/2}$  separating [1<sup>NH</sup>]<sup>0/+</sup> vs [1]<sup>+2+</sup> might arise from *N*-coordination concomitant with the formation of the dication (Olsen, 2010). With [Bu<sub>4</sub>N]BArF<sub>24</sub><sup>F</sup> as the electrolyte, the [1<sup>NH</sup>]<sup>0/+</sup> and [1<sup>NH</sup>]<sup>+2+</sup> couples are reversible and well separated but with [Bu<sub>4</sub>N]PF<sub>6</sub>, the two waves overlap at ~ -0.742 V. The effect of electrolyte on the separation of consecutive redox couples has been described by Geiger et al. (AccChem Res)

**Table S1.** Electrochemical Properties of **1** and **2**.

| <b>Compound</b>                                                  | <b><math>E_{1/2}</math> in <math>\text{CH}_2\text{Cl}_2</math><br/>(V vs <math>\text{Fc}^{+/0}</math>)</b> | <b>Assignment</b>                                                       | <b><math>i_{pc}/i_{pa}</math></b> |
|------------------------------------------------------------------|------------------------------------------------------------------------------------------------------------|-------------------------------------------------------------------------|-----------------------------------|
| $\text{Fe}_2(\text{adt})(\text{CO})_2(\text{dppv})_2$ , <b>1</b> | -0.840, -0.616                                                                                             | $[\mathbf{1}^{\text{NH}}]^{0/+}$ ,<br>$[\mathbf{1}^{\text{NH}}]^{+/2+}$ | 0.78, 0.79                        |
| $\text{Fe}_2(\text{pdt})(\text{CO})_2(\text{dppv})_2$ , <b>2</b> | -0.940, 0.124                                                                                              | $[\mathbf{2}]^{0/+}$ , $[\mathbf{2}]^{+/2+}$                            | 0.98, irrev                       |

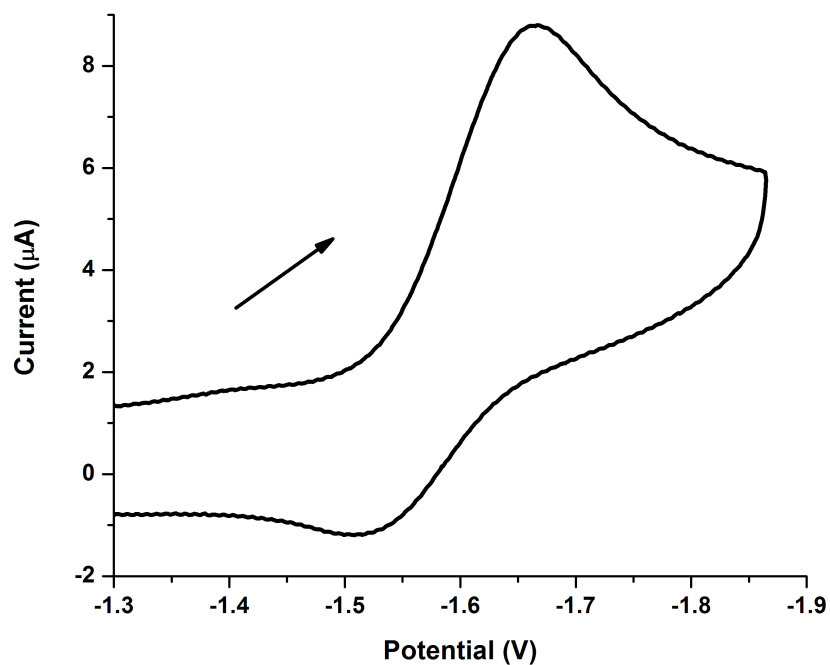

**Figure S26.** Cyclic voltammogram of  $[t\text{-H}1^{\text{NH}}]^+$  formed *in situ* by addition of 1 equivalent of  $[\text{H}(\text{OEt}_2)_2][\text{BAR}^{\text{F}}_{24}]$  to a solution of  $1^{\text{NH}}$  at  $-78^\circ\text{C}$ . (Conditions: 0.036 M  $[\text{Bu}_4\text{N}][\text{BAR}^{\text{F}}_{24}]$  in  $\text{CH}_2\text{Cl}_2$ , 1.4 mM  $1^{\text{NH}}$ , GC working electrode, Pt counter electrode, Ag wire pseudo reference electrode, Fc internal standard, Scan Rate = 0.5 V/s)

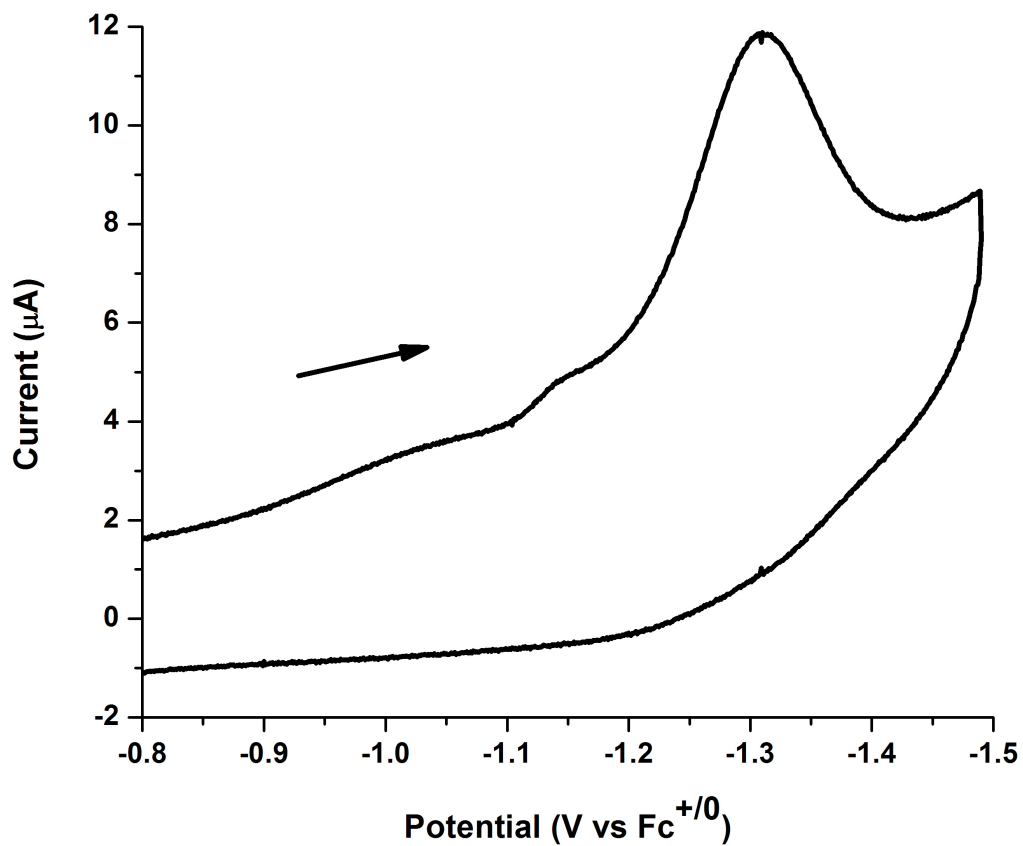

**Figure S27.** Cyclic voltammogram of  $[t\text{-H1}^{\text{NH}_2}]^{2+}$  at formed *in situ* by addition of 2 equivalents of  $[\text{HOEt}_2]\text{BF}_4$  to a solution of  $\mathbf{1}^{\text{NH}}$  at  $-78^\circ\text{C}$ . (Conditions: 0.0125 M  $[\text{Bu}_4\text{N}][\text{BARF}_{24}]$  in  $\text{CH}_2\text{Cl}_2$ , 0.5 mM  $\mathbf{1}^{\text{NH}}$ , GC working electrode, Pt counter electrode, Ag wire pseudo reference electrode, Fc internal standard, Scan Rate = 0.5 V/s)

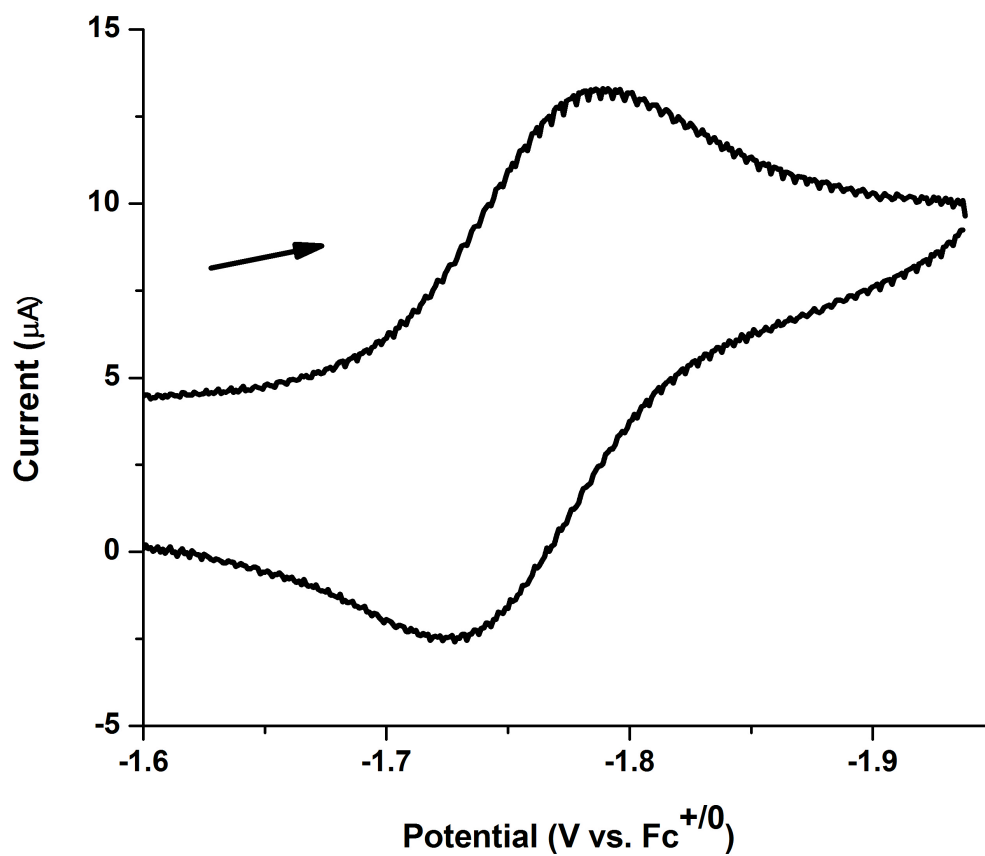

**Figure S28.** Cyclic voltammogram of  $[\mu\text{-H1}^{\text{NH}}]^+$  (Conditions: 0.1 M  $[\text{Bu}_4\text{N}]\text{PF}_6$  in  $\text{CH}_2\text{Cl}_2$ , 1.0 mM  $[\mu\text{-H1}^{\text{NH}}]^+$ , GC working electrode, Pt counter electrode, Ag wire pseudo reference electrode, Fc internal standard, Scan Rate = 0.1 V/s)

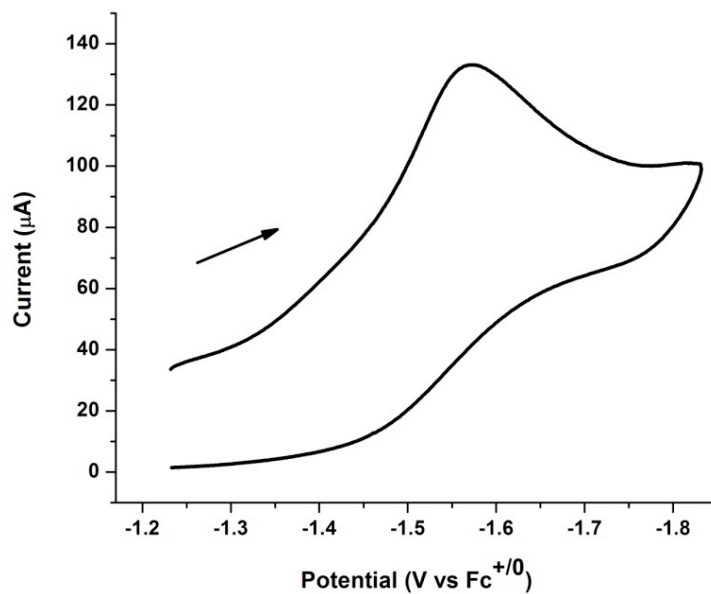

**Figure S29.** Cyclic voltammogram of  $[\mu\text{-H1}^{\text{NH}_2}]^{2+}$  (Conditions: 0.15 M  $[\text{Bu}_4\text{N}][\text{PF}_6]$  in  $\text{CH}_2\text{Cl}_2$ , 2.0 mM  $[\mu\text{-H1}^{\text{NH}_2}]^{2+}$ , GC working electrode, Pt counter electrode, Ag wire pseudo reference electrode, Fc internal standard, Scan Rate = 0.5 V/s)

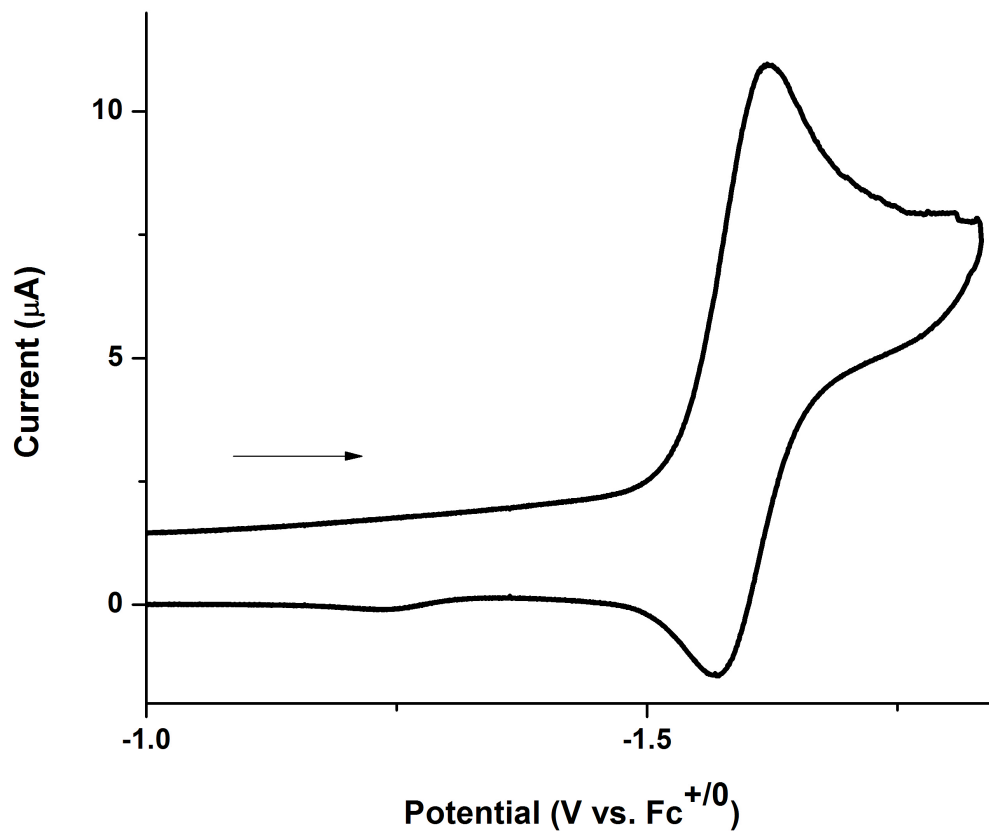

**Figure 30.** Cyclic voltammogram of  $[t\text{-H2}]^+$  formed *in situ* by addition of 1 equivalent of  $[\text{H}(\text{OEt}_2)_2][\text{BF}_4]$  to a solution of **2** at  $-40^\circ\text{C}$ . (Conditions: 0.1 M  $[\text{Bu}_4\text{N}][\text{PF}_6]$  in  $\text{CH}_2\text{Cl}_2$ , 1.0 mM **1**, GC working electrode, Pt counter electrode, Ag wire pseudo reference electrode, Fc internal standard, Scan Rate = 0.1 V/s)



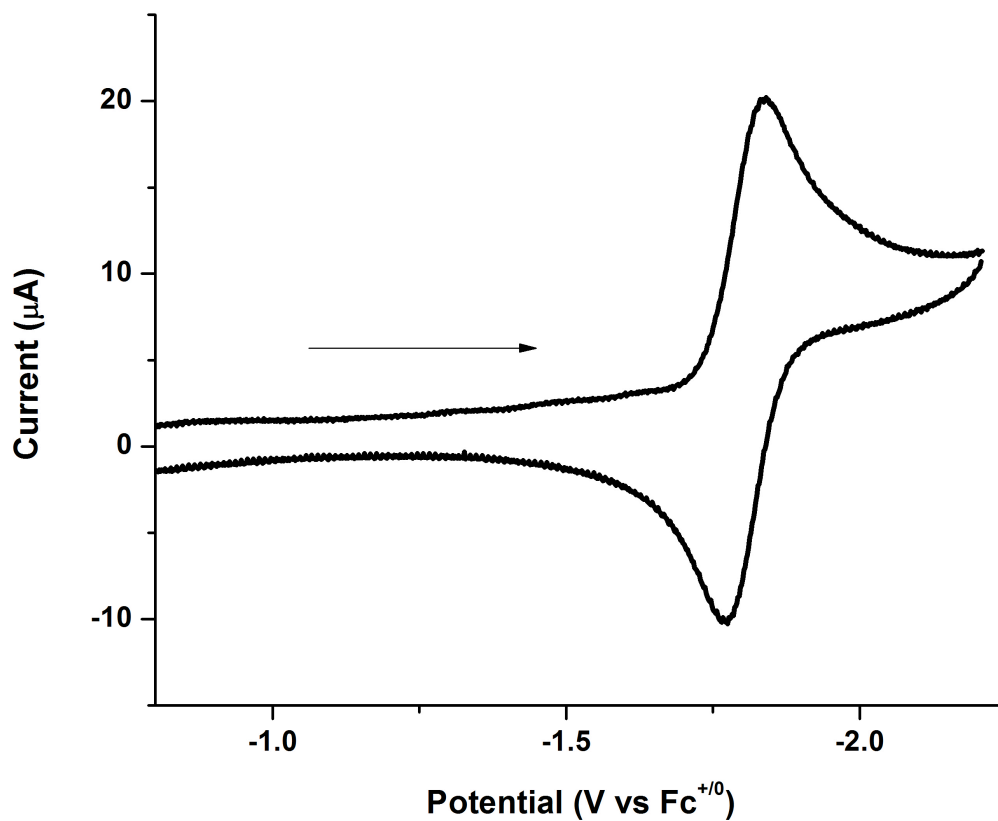

**Figure S31.** Cyclic voltammogram of  $[\mu\text{-H}_2][\text{PF}_6]$  (Conditions: 0.1 M  $[\text{Bu}_4\text{N}][\text{PF}_6]$  in  $\text{CH}_2\text{Cl}_2$ , 1.0 mM  $[\mu\text{-H}_2][\text{PF}_6]$ , GC working electrode, Pt counter electrode, Ag wire pseudo reference electrode, Fc internal standard, Scan Rate = 0.1 V/s)

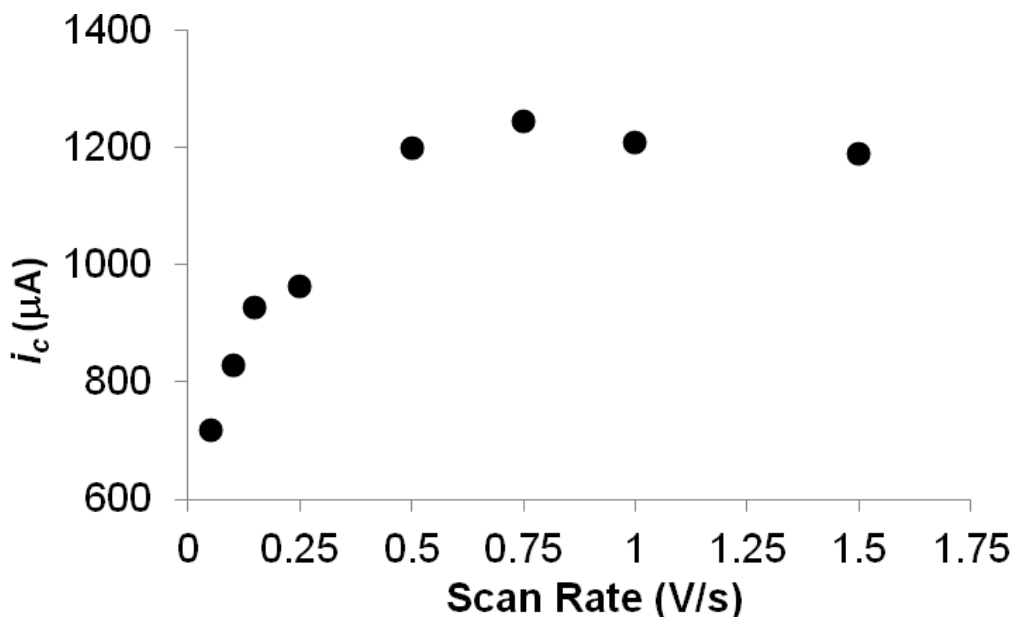

**Figure S32.** Plot of  $i_c$  vs. scan rate for  $[t\text{-H1}^{\text{NH}}]^+$  (Conditions: 0.125 M  $[\text{Bu}_4\text{N}][\text{BArF}_{24}]$  in  $\text{CH}_2\text{Cl}_2$ , 1.0 mM  $1^{\text{NH}}$ , GC working electrode, Pt counter electrode, Ag wire pseudo reference electrode, Fc internal standard, 0 °C)

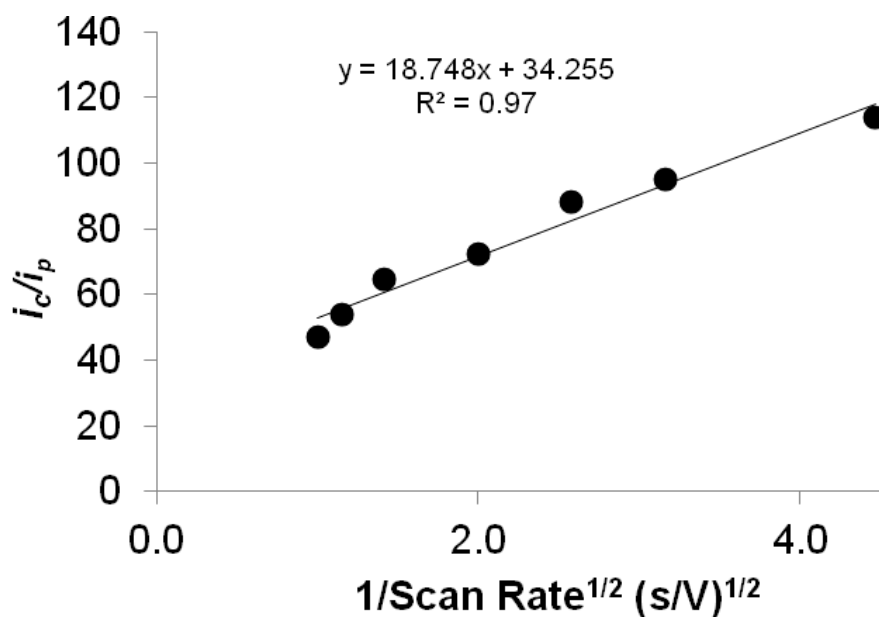

**Figure S33.** Plot of  $i_c/i_p$  vs.  $1/\text{scan rate}^{1/2}$  for  $[t\text{-H1}^{\text{NH}}]^+$  (Conditions see Figure S29).

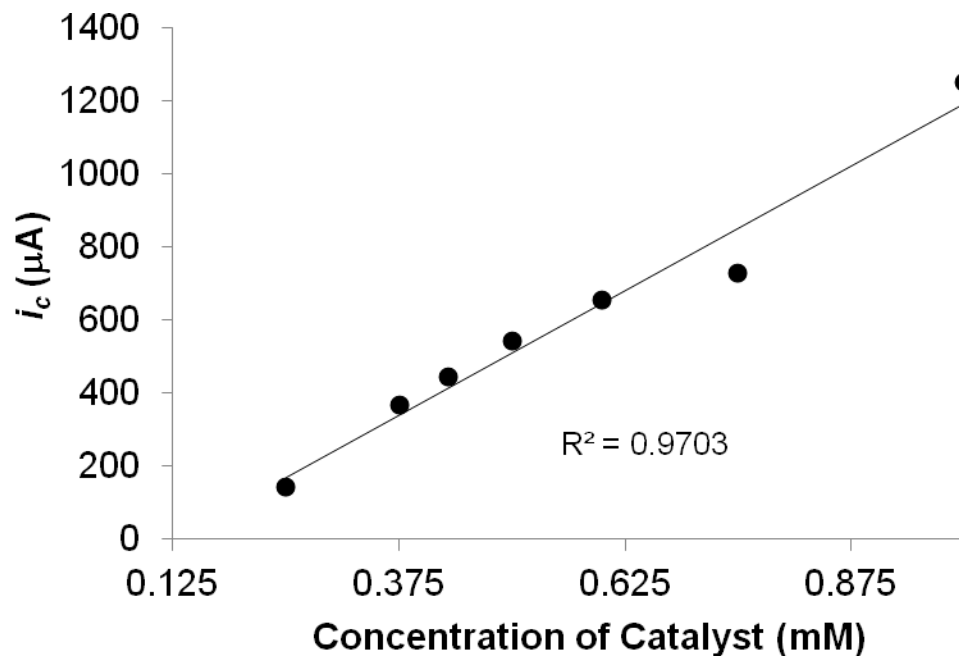

**Figure S34.** Plot of  $i_c$  vs. catalyst concentration for  $[t\text{-H1}^{\text{NH}}]^+$  (Conditions: 0.125 M  $[\text{Bu}_4\text{N}][\text{BArF}_4]$  in  $\text{CH}_2\text{Cl}_2$ , 1.0 mmol  $\text{H}_2\text{CICCOOH}$ , GC working electrode, Pt counter electrode, Ag wire pseudo reference electrode, Fc internal standard, 0 °C)

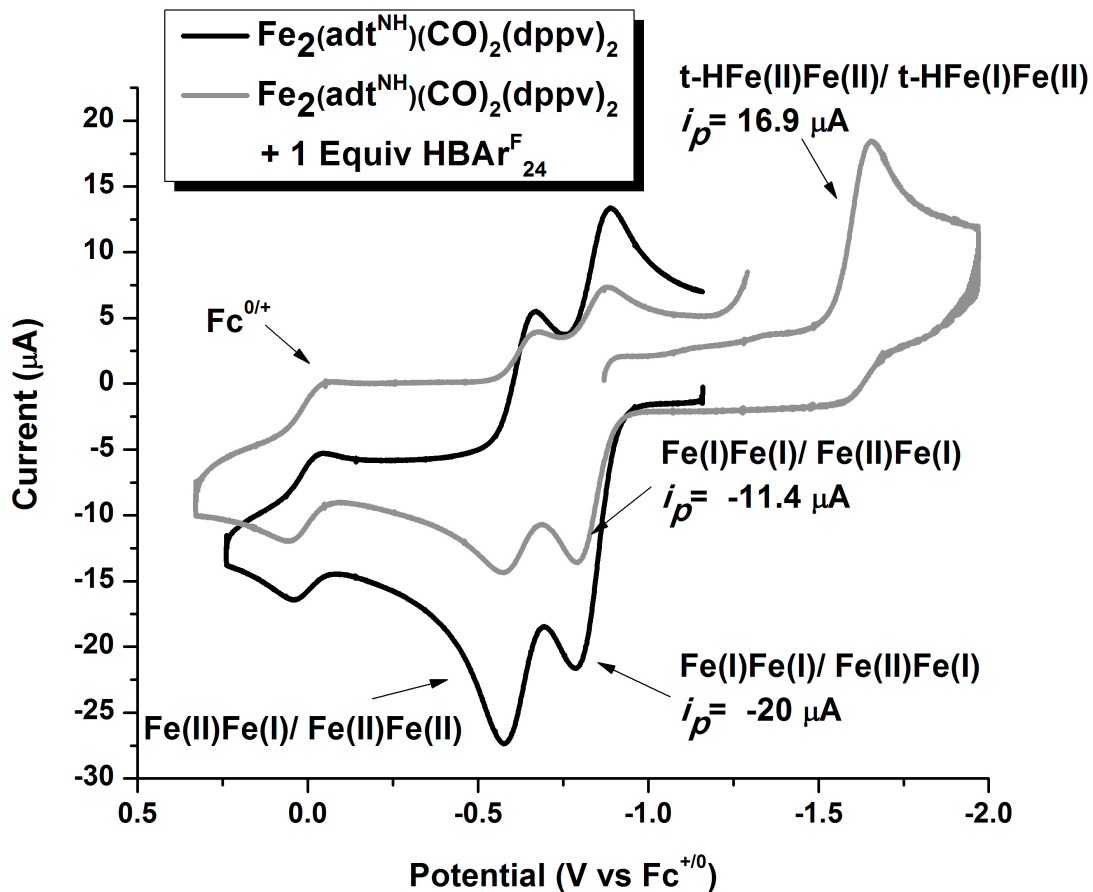

**Figure S35.** Comparison of  $i$  for oxidation of  $\mathbf{1}^{\text{NH}}$  vs  $i$  for reduction of  $[\text{t-H1}]^+$ . We attribute the irreversibility of the  $t\text{-HFe(II)Fe(II)}^{\text{NH}} / t\text{-HFe(I)Fe(II)}^{\text{NH}}$  to a disproportionation reaction, in which  $\text{H}_2$  is released, along with  $\frac{1}{2}$  an equivalent each of  $\mathbf{1}^{\text{NH}}$  and  $[\mathbf{1}^{\text{NH}}]^+$ .

a.

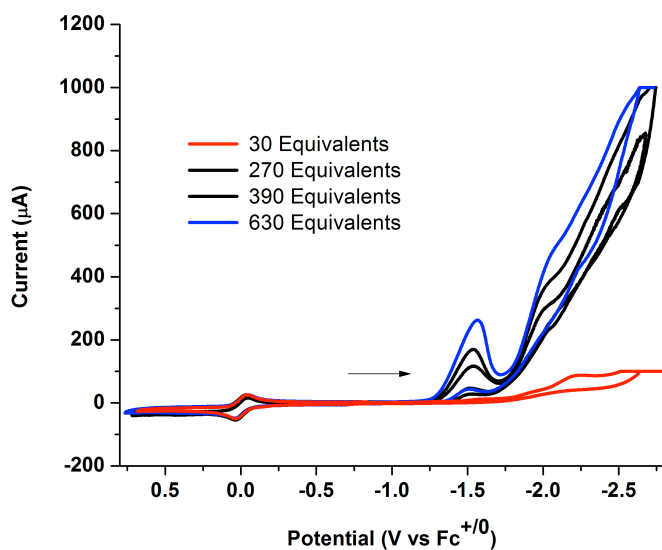

b.

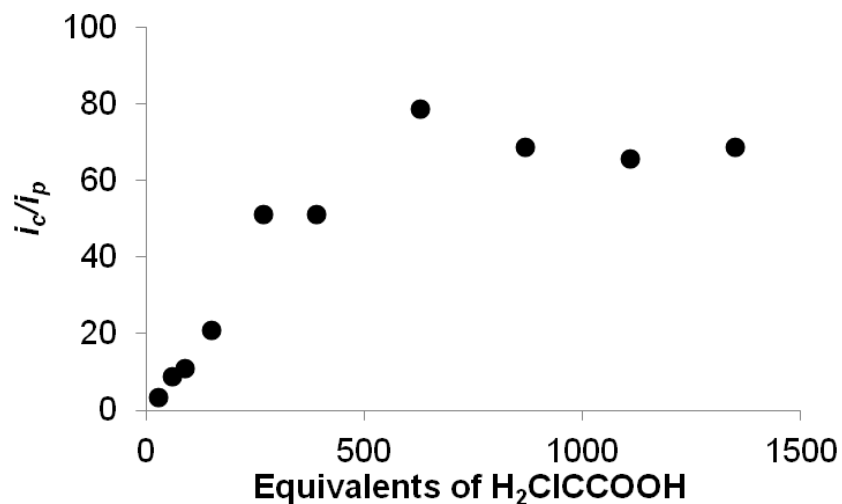

**Figure S36.** a. Cyclic voltammograms of  $\text{Fe}_2(\text{adt}^{\text{NH}})(\text{CO})_2(\text{dppv})_2$  ( $1^{\text{NH}}$ ) with increasing amounts of  $\text{Cl}_2\text{HCCOOH}$ . (Conditions: 0.1 M  $[\text{Bu}_4\text{N}][\text{PF}_6]$  in MeCN, 1.0 mM  $[\mu\text{-1H}]^+$ , 0 °C, GC working electrode, Pt counter electrode, Ag wire pseudo reference electrode, Fc internal standard, Scan Rate = 0.1 V/s) b. Plot of  $i_c/i_p$  vs. equivalents of acid.

a.

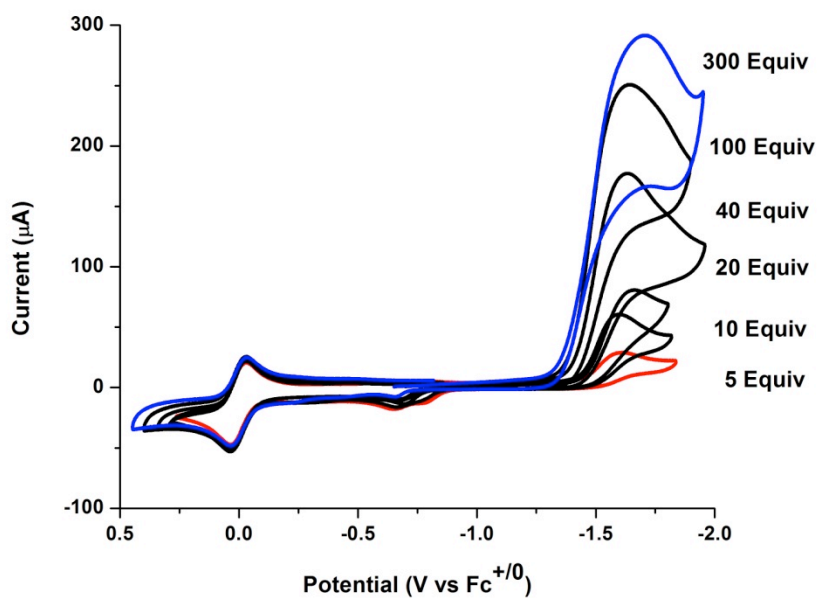

b.

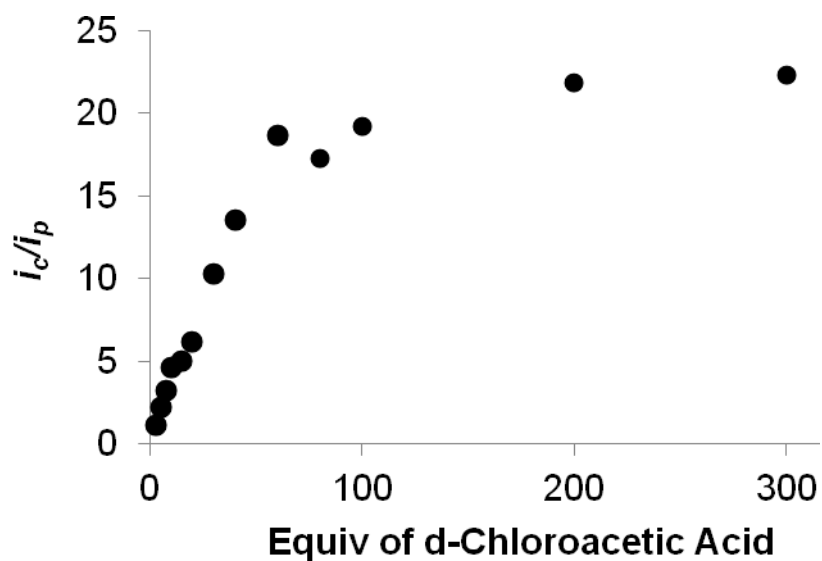

**Figure S37.** a. Cyclic voltammograms of a 1.00 mM solution of  $1^{\text{NH}}$  (0  $^{\circ}\text{C}$ , 0.125 M  $[\text{Bu}_4\text{N}][\text{BAR}^{\text{F}}_{24}]$ ,  $\text{CH}_2\text{Cl}_2$ , scan rate = 0.5 V/s, GC working electrode, Pt counter electrode, Ag wire pseudo reference electrode, Fc internal standard) recorded with increasing equivalents of  $\text{ClCH}_2\text{CO}_2\text{D}$ . b. Plot of  $i_c/i_p$  vs. equivalents of acid.

a.

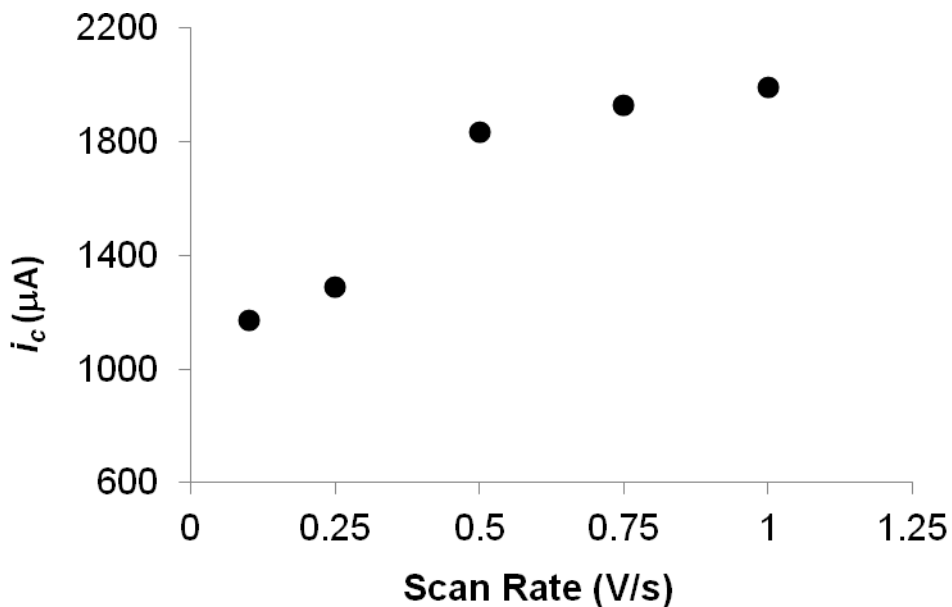

b.

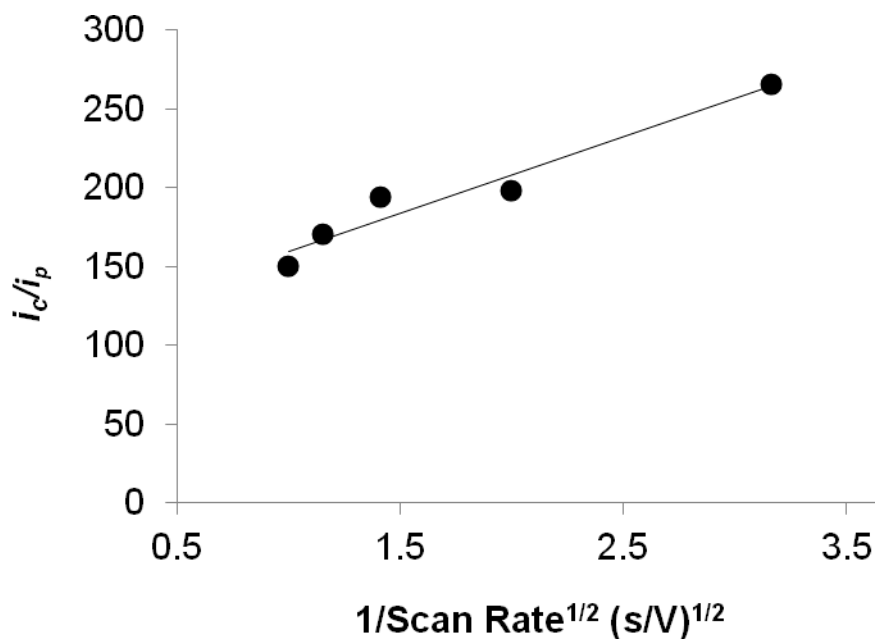

**Figure S38.** a. Plot of  $i_c$  vs. scan rate for  $[t\text{-H1}^{\text{NH}_2}]^{2+}$  (Conditions: 0.1 M  $[\text{Bu}_4\text{N}][\text{BARF}_{24}]$  in  $\text{CH}_2\text{Cl}_2$ , 0.5 mM  $1^{\text{NH}}$ , GC working electrode, 0.67 M  $\text{CF}_3\text{COOH}$ , Pt counter electrode, Ag wire pseudo reference electrode, Fc internal standard, 0 °C) b. Plot of  $i_c/i_p$  vs.  $1/\text{scan rate}^{1/2}$  for  $[t\text{-H1}^{\text{NH}_2}]^{2+}$ .

a.

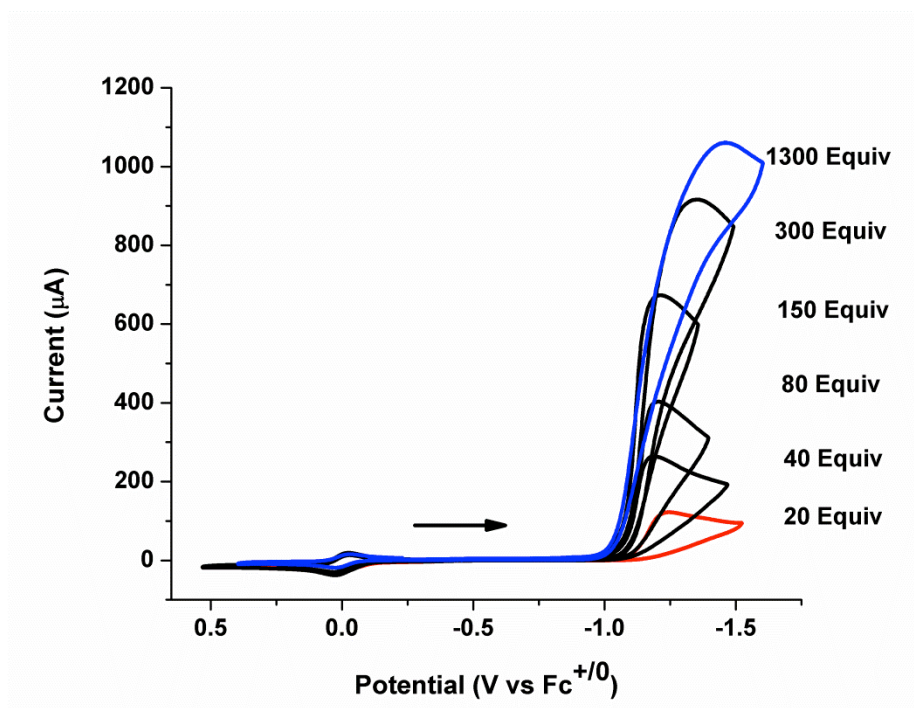

b.

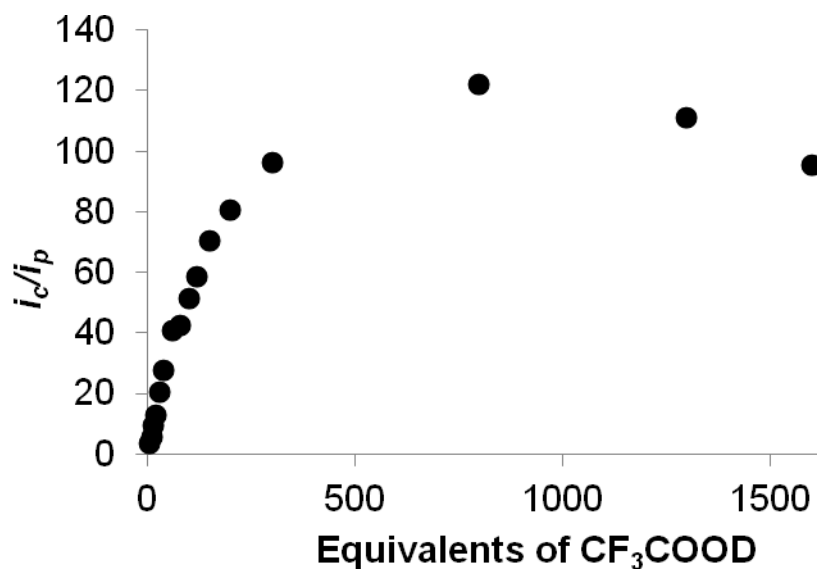

**Figure S39.** a. Cyclic voltammograms of a 0.6 mM solution of  $1^{\text{NH}}$  (0 °C, 0.005 M [Bu<sub>4</sub>N][BAr<sub>24</sub><sup>F</sup>], CH<sub>2</sub>Cl<sub>2</sub>, scan rate = 0.25 V/s, GC working electrode, Pt counter electrode, Ag wire pseudo reference electrode, Fc internal standard) recorded with increasing equivs of CF<sub>3</sub>CO<sub>2</sub>D. b. Plot of  $i_c/i_p$  vs. equiv of acid.



a.

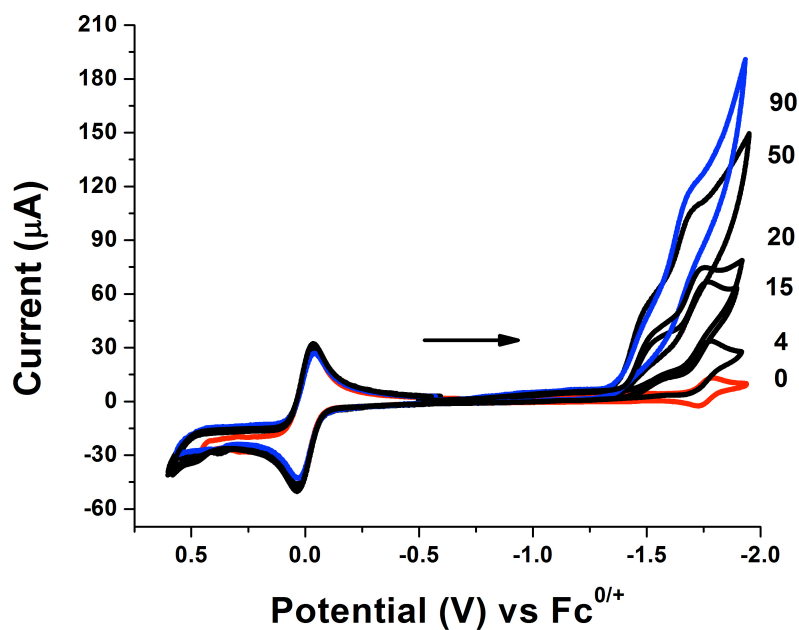

b.

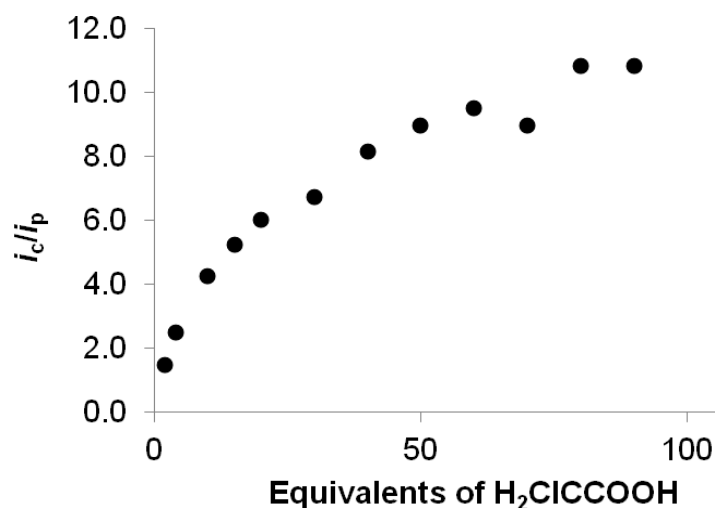

**Figure S40.** a. Cyclic voltammograms of  $[\mu\text{-HFe}_2(\text{adtc})(\text{CO})_2(\text{dppv})_2]^+$  ( $[\mu\text{-H1}^{\text{NH}}]^+$ ) with increasing amounts of  $\text{Cl}_2\text{HCCOOH}$ . (Conditions: 0.1 M  $[\text{Bu}_4\text{N}][\text{PF}_6]$  in  $\text{CH}_2\text{Cl}_2$ , 1.0 mM  $[\mu\text{-H1}]^+$ , 0 °C, GC working electrode, Pt counter electrode, Ag wire pseudo reference electrode, Fc internal standard, Scan Rate = 0.1 V/s) (Equivalents of acid indicated to right of each CV) b. Plot of  $i_c/i_p$  vs. equivalents of acid.

a.

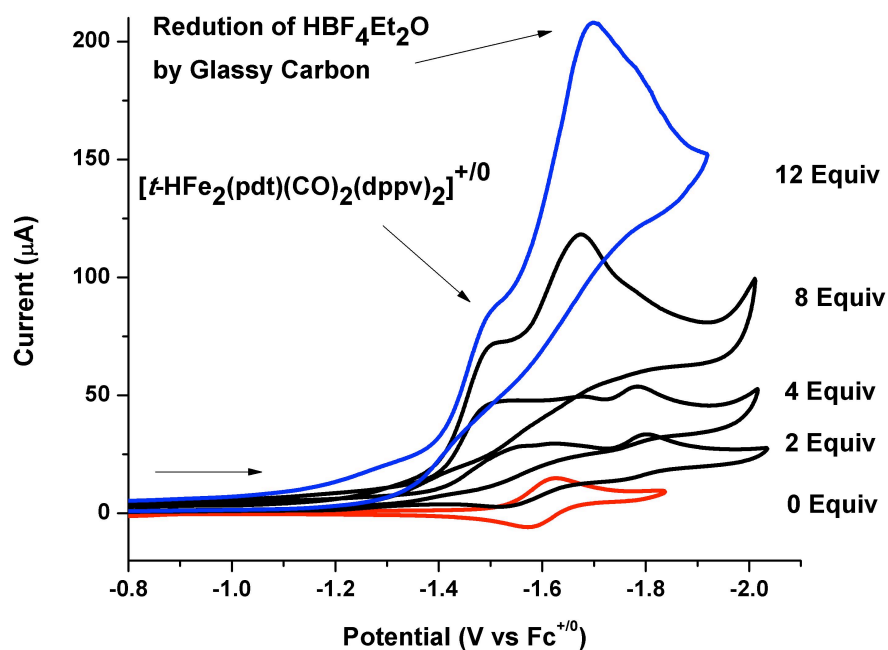

b.

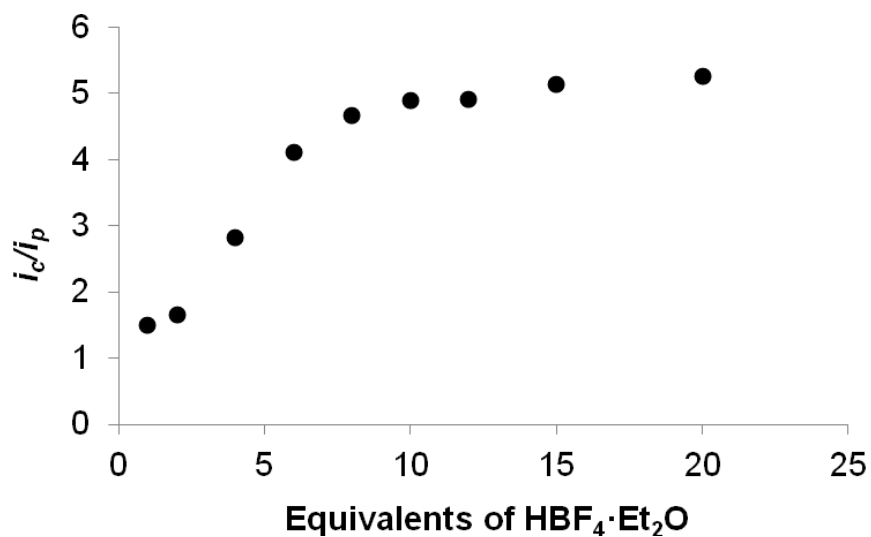

**Figure 41.** a. Cyclic voltammograms of  $[\text{t-H2}][\text{BF}_4]$  (generated and *in situ*) with increasing amounts of  $\text{HBF}_4\cdot\text{Et}_2\text{O}$ . (Equivalents of acid indicated to right of each CV). (Conditions: 0.1 M  $[\text{Bu}_4\text{N}][\text{PF}_6]$  in  $\text{CH}_2\text{Cl}_2$ , 1.0 mM  $[\text{t-H2}]^+$ , 0 °C, GC working electrode, Pt counter electrode, Ag wire pseudo reference electrode, Fc internal standard, Scan Rate = 0.1 V/s) b. Plot of  $i_c/i_p$  vs. equivalents of acid.

a.

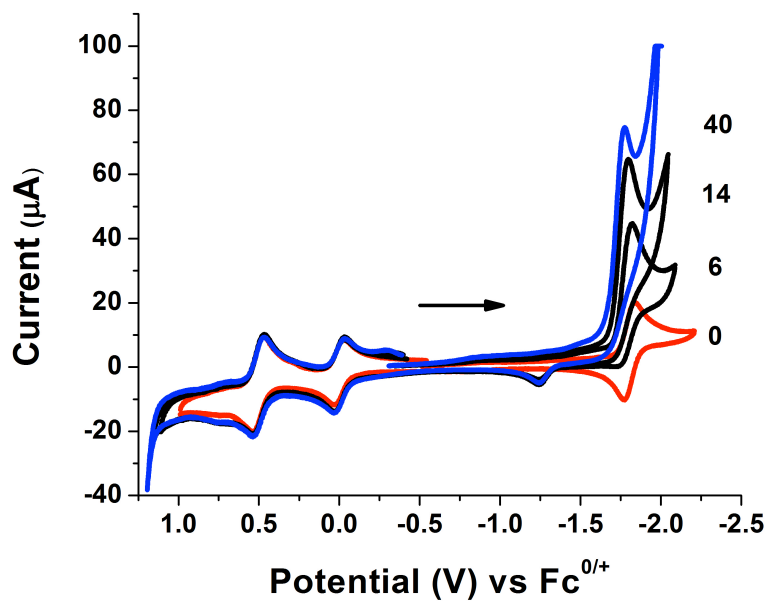

b.

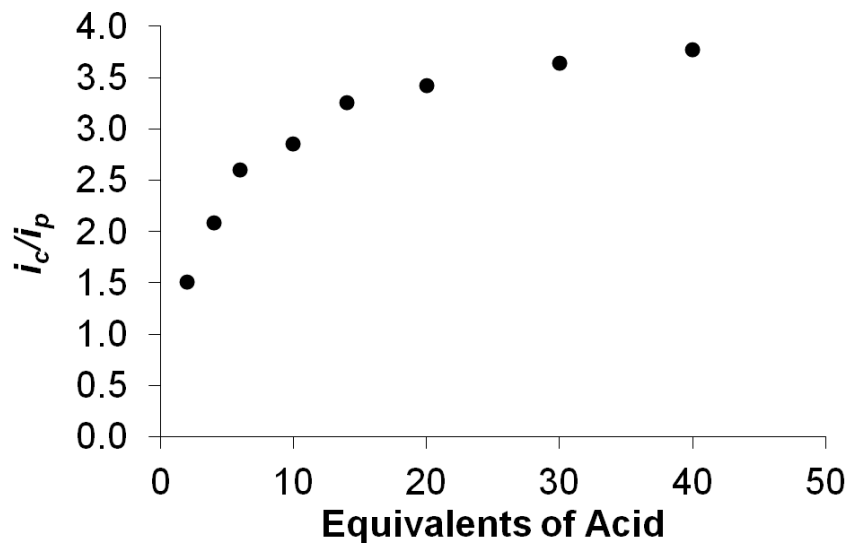

**Figure S42.** a. Cyclic voltammograms of  $[\mu\text{-H}_2][\text{PF}_6]$  with increasing amounts of  $\text{Cl}_2\text{HCCOOH}$  (Equivalents of acid indicated to right of each CV). (Conditions: 0.1 M  $[\text{Bu}_4\text{N}]\text{PF}_6$  in  $\text{CH}_2\text{Cl}_2$ , 1.0 mM  $[\mu\text{-H}_2]^+$ , 20 °C, GC working electrode, Pt counter electrode, Ag wire pseudo reference electrode, Fc internal standard, Scan Rate = 0.1 V/s) b. Plot of  $i_c/i_p$  vs. equivalents of acid.

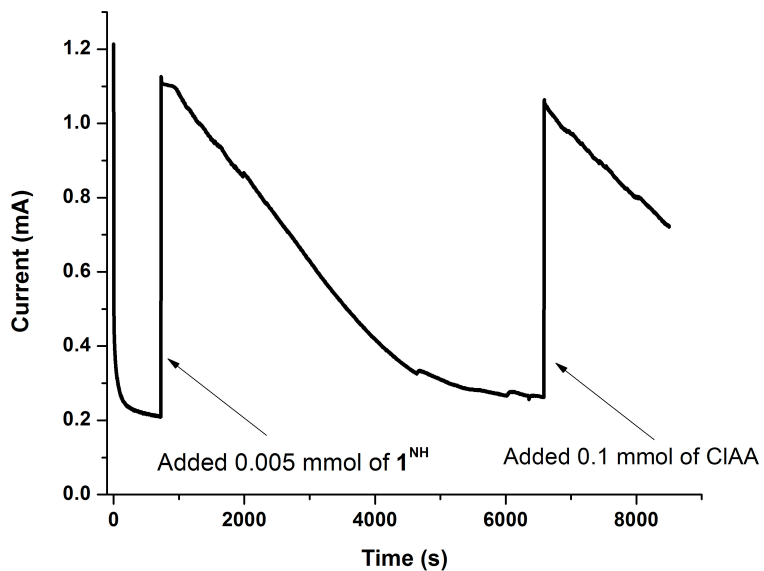

**Figure S43.** Plot of current vs time for controlled-potential electrolysis of  $[t\text{-H}1^{\text{NH}}]^+$  in a  $\text{CH}_2\text{Cl}_2$  solution of 0.1 M  $[\text{Bu}_4\text{N}]\text{PF}_6$  / 10 mM  $\text{ClCH}_2\text{CO}_2\text{H}$ .

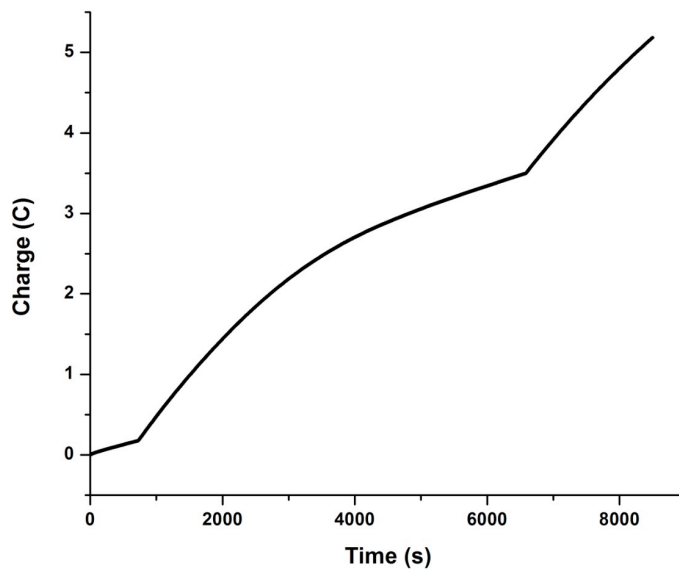

**Figure S44.** Plot of charge vs time for controlled-potential electrolysis of  $[t\text{-H}1^{\text{NH}}]^+$  in a  $\text{CH}_2\text{Cl}_2$  solution of 0.1 M  $[\text{Bu}_4\text{N}]\text{PF}_6$  / 10 mM  $\text{ClCH}_2\text{CO}_2\text{H}$ .

**Table S2.** Experimental results from controlled-potential electrolysis experiment.

| <b>Time (s)</b>                    | <b>1473</b>           | <b>4300</b>           | <b>5500</b>           |
|------------------------------------|-----------------------|-----------------------|-----------------------|
| <b>Total Charge (C)</b>            | 0.957                 | 2.823                 | 3.204                 |
| <b>Calc mmol H<sub>2</sub></b>     | $4.96 \times 10^{-3}$ | $1.46 \times 10^{-2}$ | $1.66 \times 10^{-2}$ |
| <b>Calc Vol H<sub>2</sub> (μL)</b> | 111                   | 328                   | 372                   |
| <b>Exp mmol H<sub>2</sub></b>      | $4.32 \times 10^{-3}$ | $1.48 \times 10^{-2}$ | $1.82 \times 10^{-2}$ |
| <b>Exp Vol H<sub>2</sub> (μL)</b>  | 97                    | 332                   | 408                   |
| <b>Efficiency</b>                  | 87                    | 101                   | 110                   |

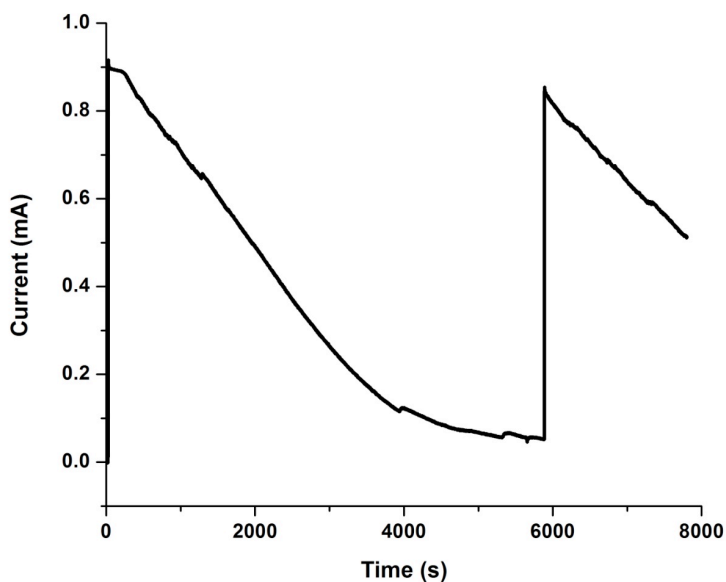

**Figure S45.** Plot of current vs time for controlled-potential electrolysis of  $[t\text{-H1}^{\text{NH}}]^+$  in a  $\text{CH}_2\text{Cl}_2$  solution of 0.1 M  $[\text{Bu}_4\text{N}]\text{PF}_6$  / 10 mM  $\text{ClCH}_2\text{CO}_2\text{H}$ . To account for current due to direct reduction of protons at the carbon electrode, 0.21 mA has been subtracted. Time = 0 s corresponds to the time at which catalyst was added to the solution.

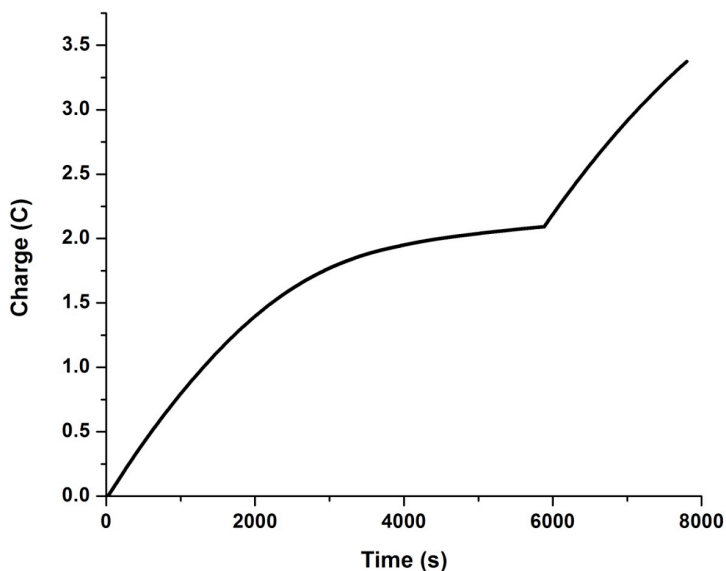

**Figure S46.** Plot of charge vs time for controlled-potential electrolysis  $[t\text{-H1}^{\text{NH}}]^+$  in a  $\text{CH}_2\text{Cl}_2$  solution of 0.1 M  $[\text{Bu}_4\text{N}]\text{PF}_6$  / 10 mM  $\text{ClCH}_2\text{CO}_2\text{H}$ , with background correction.

**Table S3.** Turnover number for catalysis by [*t*-H1<sup>NH</sup>]<sup>+</sup>, based on controlled-potential electrolysis experiment.

| <b>Time (s)</b>                           | <b>773</b>              | <b>3600</b>             | <b>4800</b>             | <b>5800</b>             | <b>7800</b>             |
|-------------------------------------------|-------------------------|-------------------------|-------------------------|-------------------------|-------------------------|
| <b>Charge Due to Catalyst (C)</b>         | 0.629                   | 1.90                    | 2.02                    | 2.08                    | 3.38                    |
| <b>mmol H<sub>2</sub> Due to Catalyst</b> | 3.26 x 10 <sup>-3</sup> | 9.85 x 10 <sup>-3</sup> | 1.08 x 10 <sup>-2</sup> | 1.08 x 10 <sup>-2</sup> | 1.75 x 10 <sup>-2</sup> |
| <b>Turnover Number</b>                    | 0.65                    | 1.97                    | 2.16                    | 2.16                    | 3.50                    |

## References

- (1) Li, T.; Lough, A. J.; Morris, R. H. *Chem. Eur. J.* **2007**, *13*, 3796.
- (2) Bard, A. J.; Faulkner, L. R. *Electrochemical Methods Fundamentals and Applications*; J. Wiley: New York, 2001.
- (3) Pool, D. H.; DuBois, D. L. *Journal of Organometallic Chemistry* **2009**, *694*, 2858.
- (4) Felton, G. A. N.; Glass, R. S.; Lichtenberger, D. L.; Evans, D. H. *Inorg. Chem.* **2006**, *45*, 9181.
- (5) Fourmond, V.; Jacques, P.-A.; Fontecave, M.; Artero, V. *Inorg. Chem.* **2010**, *49*, 10338.
